# Supplementary material for: Three rare-earth incorporating 6-peroxotantalo-4-selenates and catalytic activities for imidation reaction
Source: Royal Society of Chemistry journal article supplement (doi:10.1039/d2dt01332k), 2022-01-01
Supplement: d2dt01332k1.pdf [file d2dt01332k1.pdf]

# Supplementary Information

## Three rare-earth incorporating 6-peroxotantalo-4-selenate and catalytic activities for imidation reaction

Weixin Du,<sup>a#</sup> Yufeng Liu,<sup>b,c#</sup> Junjun Sun,<sup>a</sup> Haiying Wang,<sup>a</sup> Guoping Yang,<sup>\*b</sup> Dongdi Zhang<sup>\*a</sup>

<sup>a</sup>Henan Key Laboratory of Polyoxometalate Chemistry, College of Chemistry and Chemical Engineering, Henan University, Kaifeng 475004, P. R. China.

<sup>b</sup>Jiangxi Key Laboratory for Mass Spectrometry and Instrumentation, Jiangxi Province Key Laboratory of Synthetic Chemistry, East China University of Technology, Nanchang, 330013, P. R. China.

<sup>c</sup>Guangdong Provincial Key Lab of Green Chemical Product Technology, Guangzhou, 510640, P. R. China.

**Table S1.** Crystal Data and Structure Refinement of Compounds **STD-Eu**, **STD-Gd** and **STD-Lu**.

|                                                 | <b>STD-Eu</b>                                                       | <b>STD-Gd</b>                                                       | <b>STD-Lu</b>                                                       |
|-------------------------------------------------|---------------------------------------------------------------------|---------------------------------------------------------------------|---------------------------------------------------------------------|
| Empirical formula                               | CsKEuSe <sub>4</sub> Ta <sub>6</sub> O <sub>53</sub> H <sub>4</sub> | CsKGdSe <sub>4</sub> Ta <sub>6</sub> O <sub>53</sub> H <sub>4</sub> | CsKLuSe <sub>4</sub> Ta <sub>6</sub> O <sub>51</sub> H <sub>3</sub> |
|                                                 | 3                                                                   | 3                                                                   | 9                                                                   |
| Formula weight                                  | 2616.80                                                             | 2622.09                                                             | 2603.78                                                             |
| Temperature/K                                   | 296.15                                                              | 296.15                                                              | 296.15                                                              |
| Crystal system                                  | monoclinic                                                          | monoclinic                                                          | monoclinic                                                          |
| Space group                                     | <i>P2<sub>1</sub>/c</i>                                             | <i>P2<sub>1</sub>/c</i>                                             | <i>P2<sub>1</sub>/c</i>                                             |
| $\lambda / \text{\AA}$                          | 0.71073                                                             | 0.71073                                                             | 0.71073                                                             |
| $a / \text{\AA}$                                | 12.3382(7)                                                          | 12.3307(5)                                                          | 12.2537(9)                                                          |
| $b / \text{\AA}$                                | 27.3560(15)                                                         | 27.2604(11)                                                         | 27.308(2)                                                           |
| $c / \text{\AA}$                                | 14.0173(8)                                                          | 14.0160(6)                                                          | 13.9677(11)                                                         |
| $\alpha / ^\circ$                               | 90                                                                  | 90                                                                  | 90                                                                  |
| $\beta / ^\circ$                                | 113.7870(10)                                                        | 113.8540(10)                                                        | 114.1800(10)                                                        |
| $\gamma / ^\circ$                               | 90                                                                  | 90                                                                  | 90                                                                  |
| Volume / $\text{\AA}^3$                         | 4329.3(4)                                                           | 4308.9(3)                                                           | 4263.9(6)                                                           |
| Z                                               | 4                                                                   | 4                                                                   | 4                                                                   |
| $D_c / \text{g cm}^{-3}$                        | 3.875                                                               | 3.901                                                               | 3.970                                                               |
| $\mu / \text{mm}^{-1}$                          | 20.945                                                              | 21.128                                                              | 22.111                                                              |
| F(000)                                          | 4444.0                                                              | 4448.0                                                              | 4476.0                                                              |
| Crystal size / $\text{mm}^3$                    | 0.14 × 0.12 × 0.11                                                  | 0.34 × 0.17 × 0.13                                                  | 0.21 × 0.16 × 0.13                                                  |
| 2 $\theta$ range for data collection / $^\circ$ | 3.508 to 50.198                                                     | 3.51 to 50.198                                                      | 2.982 to 50.196                                                     |
|                                                 | -14 ≤ h ≤ 6                                                         | -14 ≤ h ≤ 14                                                        | -14 ≤ h ≤ 14                                                        |
| Limiting indices                                | -32 ≤ k ≤ 32                                                        | -21 ≤ k ≤ 32                                                        | -32 ≤ k ≤ 25                                                        |
|                                                 | -16 ≤ l ≤ 16                                                        | -16 ≤ l ≤ 16                                                        | -14 ≤ l ≤ 16                                                        |
| Reflections collected                           | 22421                                                               | 22215                                                               | 22026                                                               |
| Independent reflections                         | $R_{int} = 0.0529,$<br>$R_{sigma} = 0.0610$                         | $R_{int} = 0.0422,$<br>$R_{sigma} = 0.0478$                         | $R_{int} = 0.0578,$<br>$R_{sigma} = 0.0658$                         |
| Data/restraints/parameters                      | 7699/0/318                                                          | 7652/0/318                                                          | 7569/0/318                                                          |

|                                                                                                                                |                                    |                                    |                                    |
|--------------------------------------------------------------------------------------------------------------------------------|------------------------------------|------------------------------------|------------------------------------|
| GOF on $F^2$                                                                                                                   | 1.023                              | 1.023                              | 1.017                              |
| ${}^a R_1, {}^b wR_2$ [ $ I  \geq 2\sigma(I)$ ]                                                                                | $R_1 = 0.0421,$<br>$wR_2 = 0.0920$ | $R_1 = 0.0388,$<br>$wR_2 = 0.0910$ | $R_1 = 0.0437,$<br>$wR_2 = 0.0968$ |
| ${}^a R_1, {}^b wR_2$ [all data]                                                                                               | $R_1 = 0.0606,$<br>$wR_2 = 0.1007$ | $R_1 = 0.0493,$<br>$wR_2 = 0.0963$ | $R_1 = 0.0633,$<br>$wR_2 = 0.1059$ |
| ${}^a R_1 = \sum    F_o  -  F_c    / \sum  F_o . \quad {}^b wR_2 = \{ \sum [w(F_o^2 - F_c^2)^2] / \sum [w(F_o^2)^2] \}^{1/2}.$ |                                    |                                    |                                    |

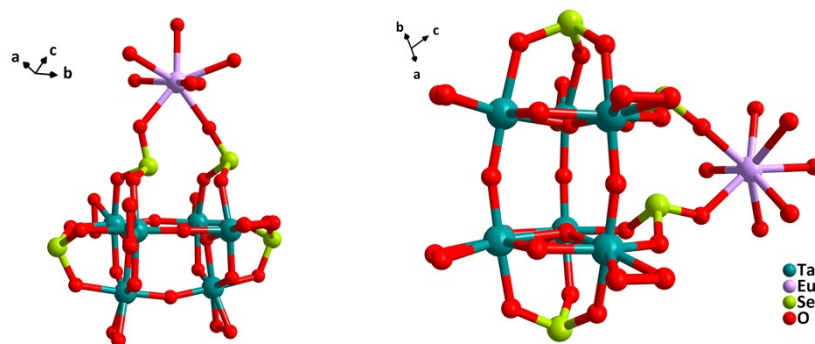

**Figure S1.** Composition of compounds **STD-Eu**, **STD-Gd** and **STD-Lu**.

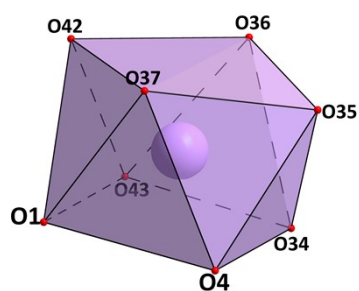

**Figure S2.** Representation of Ln coordination environment. Ln, lavender; O, red.

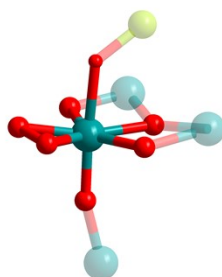

**Figure S3.** Connection mode of Ta atoms. Ta, teal; Se, lime; O, red; peroxo bond, red.

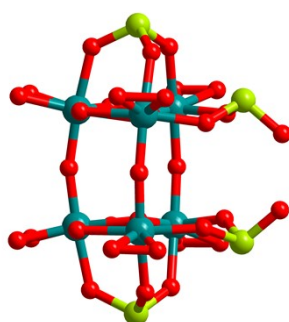

**Figure S4.** Ball-and-stick representation of polyanion  $cis\text{-}\{\text{Se}_4(\text{TaO}_2)_6\}'$ . Ta, teal; Se, lime; O, red; peroxo bond, red.

**Table S2.**  $O_{\text{axial}}\text{-Ta-}O_{\text{axial}}$  angles in polyanions **STD-Eu**, **STD-Gd** and **STD-Lu**.

| <b>Polyanion</b> | <b>STD-Eu</b> | <b>STD-Gd</b> | <b>STD-Lu</b> |
|------------------|---------------|---------------|---------------|
| O22-Ta1-O25      | 170.45°       | 170.10°       | 170.60°       |
| O26-Ta2-O27      | 169.27°       | 168.72°       | 168.66°       |
| O19-Ta3-O20      | 174.48°       | 173.88°       | 172.90°       |
| O13-Ta4-O22      | 174.72°       | 174.54°       | 174.14°       |
| O23-Ta5-O26      | 161.14°       | 160.47°       | 159.81°       |
| O19-Ta6-O21      | 176.96°       | 176.62°       | 177.09°       |

**Table S3.** Bond lengths in **STD-Eu**, **STD-Gd** and **STD-Lu**.

| Bond    | Length |        |        | Bond    | Length |        |        |
|---------|--------|--------|--------|---------|--------|--------|--------|
|         | STD-Eu | STD-Gd | STD-Lu |         | STD-Eu | STD-Gd | STD-Lu |
| Ta1-O22 | 1.894  | 1.898  | 1.889  | Ta5-O23 | 2.161  | 2.167  | 2.169  |
| Ta1-O16 | 1.982  | 1.977  | 1.969  | Ta6-O19 | 1.897  | 1.895  | 1.906  |
| Ta1-O18 | 1.985  | 1.999  | 1.991  | Ta6-O7  | 1.974  | 1.968  | 1.961  |
| Ta1-O33 | 2.054  | 2.057  | 2.054  | Ta6-O3  | 1.978  | 1.979  | 1.992  |
| Ta1-O24 | 2.077  | 2.061  | 2.063  | Ta6-O28 | 1.995  | 2.008  | 2.012  |
| Ta1-O25 | 2.063  | 2.067  | 2.052  | Ta6-O31 | 2.072  | 2.080  | 2.082  |
| Ta1-O30 | 2.069  | 2.086  | 2.067  | Ta6-O29 | 2.074  | 2.084  | 2.088  |
| Ta2-O26 | 1.847  | 1.842  | 1.842  | Ta6-O21 | 2.149  | 2.135  | 2.136  |
| Ta2-O6  | 1.986  | 1.995  | 1.985  | Ln-O4   | 2.309  | 2.296  | 2.224  |
| Ta2-O5  | 1.966  | 1.973  | 1.971  | Ln-O43  | 2.384  | 2.355  | 2.292  |
| Ta2-O9  | 2.051  | 2.054  | 2.058  | Ln-O37  | 2.405  | 2.387  | 2.293  |
| Ta2-O33 | 2.102  | 2.099  | 2.100  | Ln-O1   | 2.406  | 2.401  | 2.317  |
| Ta2-O32 | 2.094  | 2.105  | 2.092  | Ln-O36  | 2.427  | 2.419  | 2.324  |
| Ta2-O27 | 2.143  | 2.143  | 2.139  | Ln-O34  | 2.448  | 2.421  | 2.346  |
| Ta3-O19 | 1.897  | 1.891  | 1.883  | Ln-O42  | 2.465  | 2.457  | 2.373  |
| Ta3-O8  | 1.978  | 1.967  | 1.953  | Ln-O35  | 2.503  | 2.504  | 2.431  |
| Ta3-O12 | 1.979  | 1.984  | 1.975  | Se1-O27 | 1.693  | 1.687  | 1.694  |
| Ta3-O30 | 2.030  | 2.033  | 2.041  | Se1-O20 | 1.706  | 1.714  | 1.708  |
| Ta3-O32 | 2.048  | 2.045  | 2.052  | Se1-O25 | 1.709  | 1.715  | 1.729  |
| Ta3-O20 | 2.099  | 2.088  | 2.084  | Se2-O13 | 1.693  | 1.696  | 1.683  |
| Ta3-O33 | 2.091  | 2.097  | 2.095  | Se2-O23 | 1.706  | 1.700  | 1.699  |

---

|         |       |       |       |         |       |       |       |
|---------|-------|-------|-------|---------|-------|-------|-------|
| Ta4-O22 | 1.921 | 1.915 | 1.921 | Se2-O21 | 1.694 | 1.700 | 1.694 |
| Ta4-O14 | 1.976 | 1.988 | 1.979 | Se3-O4  | 1.632 | 1.642 | 1.647 |
| Ta4-O10 | 1.993 | 1.999 | 1.985 | Se3-O15 | 1.710 | 1.716 | 1.704 |
| Ta4-O31 | 2.040 | 2.037 | 2.031 | Se3-O17 | 1.724 | 1.723 | 1.719 |
| Ta4-O15 | 2.052 | 2.049 | 2.059 | Se4-O1  | 1.661 | 1.653 | 1.667 |
| Ta4-O29 | 2.086 | 2.072 | 2.073 | Se4-O24 | 1.702 | 1.715 | 1.714 |
| Ta4-O13 | 2.092 | 2.089 | 2.090 | Se4-O9  | 1.708 | 1.723 | 1.713 |
| Ta5-O28 | 1.920 | 1.924 | 1.912 | O3-O7   | 1.504 | 1.509 | 1.537 |
| Ta5-O11 | 1.956 | 1.964 | 1.931 | O8-O12  | 1.509 | 1.539 | 1.486 |
| Ta5-O2  | 1.992 | 1.965 | 1.980 | O2-O11  | 1.439 | 1.478 | 1.451 |
| Ta5-O26 | 2.001 | 2.006 | 2.006 | O5-O6   | 1.484 | 1.485 | 1.478 |
| Ta5-O17 | 2.049 | 2.041 | 2.035 | O14-O10 | 1.488 | 1.494 | 1.501 |
| Ta5-O31 | 2.114 | 2.112 | 2.116 | O16-O18 | 1.508 | 1.494 | 1.494 |

---

**Table S4.**  $O_{\text{peroxo}}\text{-Ta-}O_{\text{peroxo}}$ ,  $O_{\text{apical}}\text{-Ta-}O_{\text{apical}}$  and  $\text{Ta-}O_{\text{apical}}\text{-Ta}$  angle in polyanions **STD-Eu**, **STD-Gd**, **STD-Lu** and **Se<sub>4</sub>Ta<sub>6</sub>**.

| <b>Polyanion</b>                                                            | <b>STD-Eu</b> | <b>STD-Gd</b> | <b>STD-Lu</b> | <b>Polyanion</b> | <b>Se<sub>4</sub>Ta<sub>6</sub></b> |
|-----------------------------------------------------------------------------|---------------|---------------|---------------|------------------|-------------------------------------|
| <b><math>O_{\text{peroxo}}\text{-Ta-}O_{\text{peroxo}}</math> angle (°)</b> |               |               |               |                  |                                     |
| O16-Ta1-O18                                                                 | 44.69         | 44.15         | 44.31         | O4-Ta1-O5        | 44.23                               |
| O5-Ta2-O6                                                                   | 44.12         | 43.96         | 43.87         | O7-Ta2-O8        | 44.91                               |
| O8-Ta3-O12                                                                  | 44.84         | 45.86         | 44.45         | O10-Ta3-O11      | 45.02                               |
| O10-Ta4-O14                                                                 | 44.04         | 44.01         | 44.50         | O30-Ta4-O31      | 45.64                               |
| O2-Ta5-O11                                                                  | 42.75         | 44.20         | 43.55         | O21-Ta5-O22      | 45.06                               |
| O3-Ta6-O7                                                                   | 44.74         | 44.94         | 45.76         | O25-Ta6-O26      | 44.74                               |
| Average value:                                                              | 44.19         | 44.52         | 44.41         | Average value:   | 45.02                               |
| <b><math>O_{\text{apical}}\text{-Ta-}O_{\text{apical}}</math> angle (°)</b> |               |               |               |                  |                                     |
| O22-Ta1-O25                                                                 | 170.45        | 170.10        | 170.60        | O1-Ta1-O18       | 172.40                              |
| O26-Ta2-O27                                                                 | 169.27        | 168.72        | 168.66        | O2-Ta2-O19       | 176.52                              |
| O19-Ta3-O20                                                                 | 174.48        | 173.88        | 172.90        | O3-Ta3-O17       | 169.41                              |
| O13-Ta4-O22                                                                 | 174.72        | 174.54        | 174.13        | O18-Ta4-O33      | 173.77                              |
| O23-Ta5-O26                                                                 | 161.14        | 160.47        | 159.81        | O19-Ta5-O34      | 176.35                              |
| O19-Ta6-O21                                                                 | 176.95        | 176.62        | 177.09        | O17-Ta6-O35      | 173.42                              |
| Average value:                                                              | 171.16        | 170.72        | 170.53        | Average value:   | 173.65                              |
| <b><math>\text{Ta-}O_{\text{apical}}\text{-Ta}</math> angle (°)</b>         |               |               |               |                  |                                     |
| Ta1-O22-Ta4                                                                 | 163.56        | 164.49        | 164.05        | Ta1-O18-Ta4      | 156.66                              |
| Ta2-O26-Ta5                                                                 | 166.73        | 167.73        | 167.51        | Ta2-O19-Ta5      | 160.15                              |
| Ta3-O19-Ta6                                                                 | 162.41        | 164.11        | 162.85        | Ta3-O17-Ta6      | 162.90                              |
| Average value:                                                              | 164.23        | 165.44        | 164.80        | Average value:   | 159.90                              |



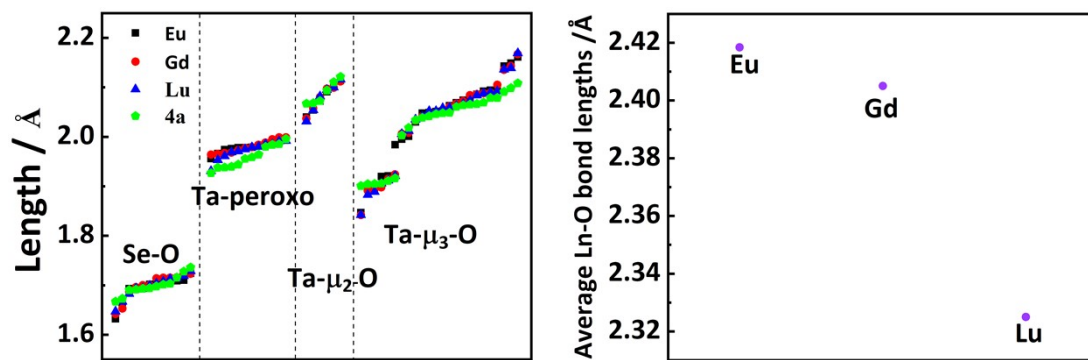

**Figure S5.** Se–O, Ta–O (left) bond lengths and the average Ln–O (right) bond length in **STD-Eu**, **STD-Gd** and **STD-Lu**.

**Table S5.** BVS calculation results.

| <b>Polyanion</b> | <b>STD-Eu</b> | <b>STD-Gd</b> | <b>STD-Lu</b> | <b>Polyanion</b> | <b>STD-Eu</b> | <b>STD-Gd</b> | <b>STD-Lu</b> |
|------------------|---------------|---------------|---------------|------------------|---------------|---------------|---------------|
| Ta1              | 5.45          | 5.41          | 5.52          | O15              | 2.01          | 1.99          | 2.02          |
| Ta2              | 5.42          | 5.38          | 5.43          | O16 <sup>#</sup> | 0.84          | 0.85          | 0.87          |
| Ta3              | 5.47          | 5.51          | 5.56          | O17              | 1.97          | 1.99          | 2.01          |
| Ta4              | 5.36          | 5.38          | 5.40          | O18 <sup>#</sup> | 0.84          | 0.81          | 0.82          |
| Ta5              | 5.34          | 5.38          | 5.46          | O19              | 2.12          | 2.15          | 2.14          |
| Ta6              | 5.46          | 5.43          | 5.37          | O20              | 1.94          | 1.94          | 1.96          |
| Se1              | 4.02          | 3.99          | 3.94          | O21              | 1.91          | 1.91          | 1.93          |
| Se2              | 4.08          | 4.06          | 4.13          | O22              | 2.07          | 2.07          | 2.08          |
| Se3              | 4.19          | 4.14          | 4.17          | O23              | 1.84          | 1.86          | 1.86          |
| Se4              | 4.16          | 4.09          | 4.07          | O24              | 1.99          | 1.98          | 1.98          |
| Ln               | 3.20          | 3.23          | 3.11          | O25              | 1.99          | 1.96          | 1.94          |
| O1               | 1.91          | 1.93          | 1.87          | O26              | 2.02          | 2.02          | 2.02          |
| O2 <sup>#</sup>  | 0.82          | 0.88          | 0.85          | O27              | 1.92          | 1.94          | 2.39          |
| O3 <sup>#</sup>  | 0.85          | 0.85          | 0.82          | O28              | 1.81          | 1.78          | 1.80          |
| O4               | 2.15          | 2.11          | 2.06          | O29 <sup>ψ</sup> | 1.29          | 1.30          | 1.29          |
| O5 <sup>#</sup>  | 0.88          | 0.87          | 0.87          | O30 <sup>ψ</sup> | 1.41          | 1.37          | 1.39          |
| O6 <sup>#</sup>  | 0.83          | 0.82          | 0.83          | O31              | 1.98          | 1.97          | 1.97          |
| O7 <sup>#</sup>  | 0.86          | 0.88          | 0.89          | O32 <sup>ψ</sup> | 1.33          | 1.32          | 1.33          |
| O8 <sup>#</sup>  | 0.85          | 0.88          | 0.91          | O33              | 1.94          | 1.92          | 1.93          |
| O9               | 2.02          | 1.96          | 1.99          | O34 <sup>‡</sup> | 0.37          | 0.38          | 0.36          |
| O10 <sup>#</sup> | 0.82          | 0.81          | 0.84          | O35 <sup>‡</sup> | 0.31          | 0.31          | 0.29          |
| O11 <sup>#</sup> | 0.90          | 0.89          | 0.97          | O36 <sup>‡</sup> | 0.39          | 0.38          | 0.38          |
| O12 <sup>#</sup> | 0.85          | 0.84          | 0.86          | O37 <sup>‡</sup> | 0.41          | 0.42          | 0.42          |
| O13              | 1.99          | 1.99          | 2.04          | O42 <sup>‡</sup> | 0.35          | 0.35          | 0.34          |
| O14 <sup>#</sup> | 0.86          | 0.83          | 0.85          | O43 <sup>‡</sup> | 0.43          | 0.45          | 0.42          |

<sup>#</sup>, <sup>‡</sup> and <sup>ψ</sup> represent peroxo oxygen atoms, H<sub>2</sub>O and OH ligands.

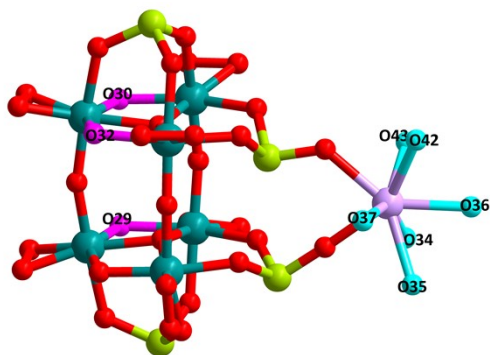

**Figure S6.** Ball-and-stick representation of polyanion **STD-Eu**, highlighting the protonated oxygen atoms. Ta, teal; Se, lime; Eu, lavender; H<sub>2</sub>O, turquoise; OH, pink; O, red; peroxo bond, red.

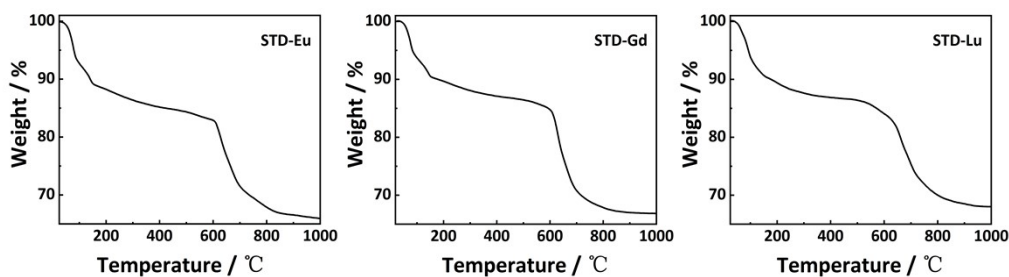

**Figure S7.** TG curves of compounds **STD-Eu**, **STD-Gd** and **STD-Lu**.

The TG curves of compounds **STD-Eu**, **STD-Gd** and **STD-Lu** show similar two-step weight loss behaviors in the temperature range of 25-1000 °C. The total weight loss of 32.62% (calcd 32.79%) for **STD-Eu** and 32.67% (calcd 32.73%) for **STD-Gd** can be attributed to 14 lattice water molecules, 9 coordinated water molecules and four SeO<sub>2</sub> molecules. However, the slightly smaller total weight loss of 31.86% (calcd 31.57%) for **STD-Lu** corresponds to 12 lattice water molecules, 9 coordinated water molecules and four SeO<sub>2</sub> molecules.

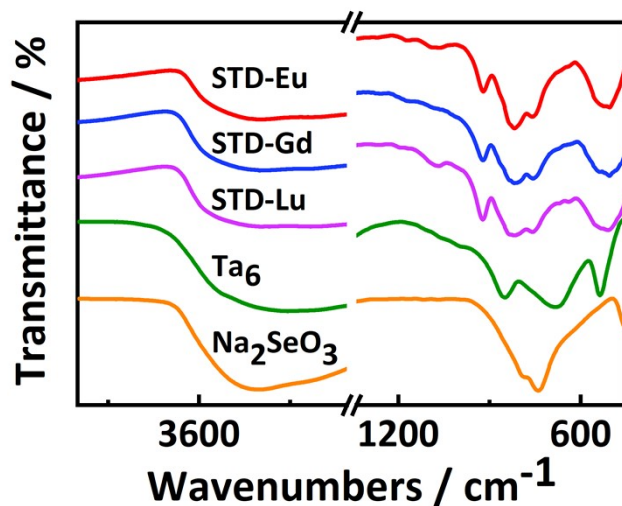

**Figure S8.** IR spectra for STD-Eu, STD-Gd, STD-Lu, Na<sub>2</sub>SeO<sub>3</sub> and Ta<sub>6</sub> in the region from 4000 to 450 cm<sup>-1</sup>.

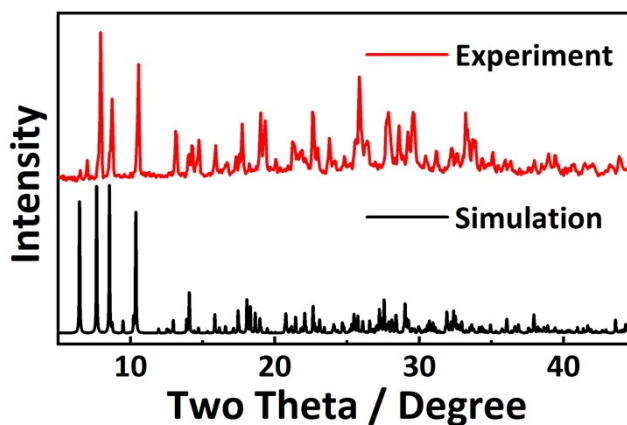

**Figure S9.** PXRD patterns (black) and simulated (red) of STD-Eu.

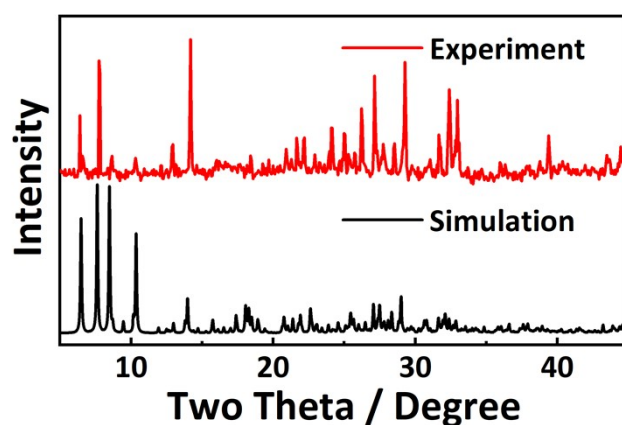

**Figure S10.** PXRD patterns (black) and simulated (red) of STD-Gd.

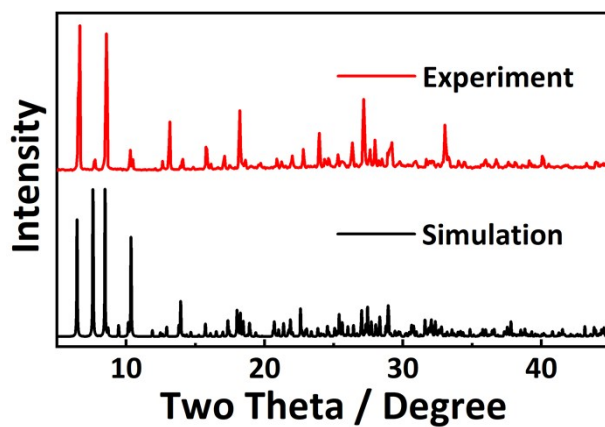

**Figure S11.** PXRD patterns (black) and simulated (red) of **STD-Lu**.

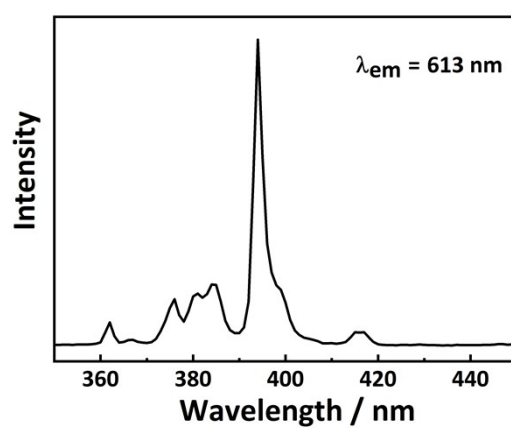

**Figure S12.** Excitation spectrum for **STD-Eu** ( $\lambda_{em} = 613 \text{ nm}$ ).

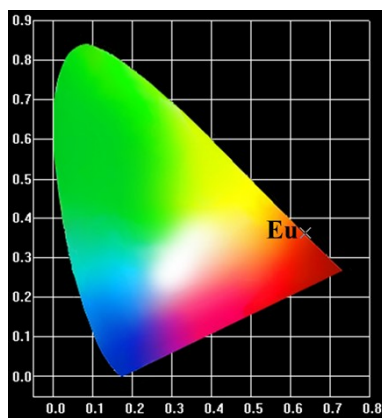

**Figure S13.** Corresponding color coordinates of **STD-Eu**.

## Experimental section

**Catalysis.** The products were isolated by column chromatography on silica gel (200-300 mesh) using petroleum ether (60-90 °C) and ethyl acetate. All compounds were characterized by  $^1\text{H}$  NMR,  $^{13}\text{C}$  NMR and mass spectrometry, which were consistent with those reported in related literatures. NMR spectra were determined on Bruker ADVANCE III spectrometer at 500 MHz and 126 MHz.  $^1\text{H}$  NMR peaks were labeled as singlet (s), doublet (d), triplet (t), and multiplet (m). The coupling constants,  $J$ , are reported in Hertz (Hz). GC analysis was performed on Agilent 7890B equipped with a capillary column (HP-5, 30 m  $\times$  0.25  $\mu\text{m}$ ) using a flame ionization detector.

## Characterization of substrates and products

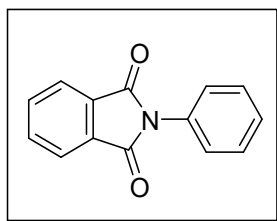

### 2-phenylisoindoline-1,3-dione (3a)<sup>S1</sup>

$^1\text{H}$  NMR (500 MHz,  $\text{CDCl}_3$ )  $\delta$  7.94 (dt,  $J$  = 6.7, 3.4 Hz, 2H), 7.78 (dd,  $J$  = 5.3, 3.1 Hz, 2H), 7.51 (t,  $J$  = 7.7 Hz, 2H), 7.47-7.37 (m, 3H);

$^{13}\text{C}$  NMR (126 MHz,  $\text{CDCl}_3$ )  $\delta$  167.34, 134.47, 131.76, 129.18, 128.17, 126.63, 123.80, 100.00.

---

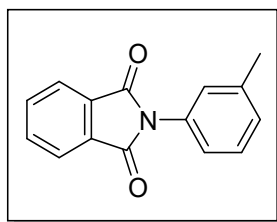

### 2-(m-tolyl)isoindoline-1,3-dione (3b)<sup>S1</sup>

$^1\text{H}$  NMR (500 MHz,  $\text{CDCl}_3$ )  $\delta$  166.85, 134.67, 134.59, 132.82, 131.51, 130.08, 128.21, 126.66, 124.62, 123.92;

$^{13}\text{C}$  NMR (126 MHz,  $\text{CDCl}_3$ )  $\delta$  176.50, 139.29, 131.86, 129.57, 129.06, 127.17, 123.65, 28.44, 21.38.

---

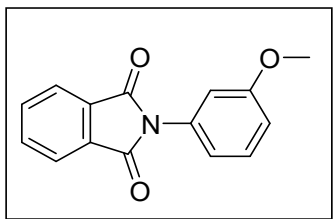

**2-(3-methoxyphenyl)isoindoline-1,3-dione (3c)<sup>S2</sup>**

**<sup>1</sup>H NMR** (500 MHz, CDCl<sub>3</sub>) δ 7.92 (dd, *J* = 5.4, 3.1 Hz, 2H), 7.78-7.74 (m, 2H), 7.39 (t, *J* = 7.7 Hz, 1H), 7.25-7.19 (m, 3H), 2.41 (s, 3H);

**<sup>13</sup>C NMR** (126 MHz, CDCl<sub>3</sub>) δ 167.42, 139.16, 134.42, 131.78, 131.53, 129.09, 128.99, 127.32, 123.81, 123.74, 21.47.

---

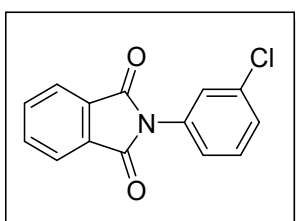

**2-(3-chlorophenyl)isoindoline-1,3-dione (3d)<sup>S2</sup>**

**<sup>1</sup>H NMR** (500 MHz, CDCl<sub>3</sub>) δ 7.95 (dd, *J* = 5.3, 3.0 Hz, 2H), 7.79 (dd, *J* = 5.3, 3.0 Hz, 2H), 7.41 (t, *J* = 8.1 Hz, 1H), 7.03 (d, *J* = 7.9 Hz, 1H), 7.00-6.93 (m, 2H), 3.84 (s, 3H);

**<sup>13</sup>C NMR** (126 MHz, CDCl<sub>3</sub>) δ 167.27, 160.05, 134.46, 132.65, 131.73, 129.85, 123.79, 118.91, 114.14, 112.37, 55.46.

---

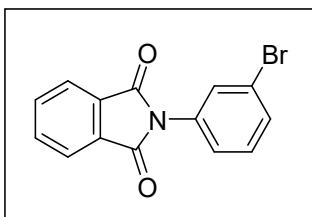

**2-(3-bromophenyl)isoindoline-1,3-dione (3e)<sup>S2</sup>**

**<sup>1</sup>H NMR** (500 MHz, CDCl<sub>3</sub>) δ 7.93 (dd, *J* = 4.9, 3.3 Hz, 2H), 7.79 (dd, *J* = 5.1, 3.1 Hz, 2H), 7.64 (s, 1H), 7.52 (d, *J* = 7.8 Hz, 1H), 7.42 (d, *J* = 7.9 Hz, 1H), 7.37 (t, *J* = 7.9 Hz, 1H);

**<sup>13</sup>C NMR** (126 MHz, CDCl<sub>3</sub>) δ 166.84, 134.68, 132.94, 131.49, 131.12, 130.35, 129.48, 125.12, 123.93, 122.41.

---

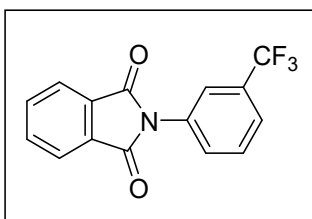

**2-(3-(trifluoromethyl)phenyl)isoindoline-1,3-dione (3f)<sup>S2</sup>**

**<sup>1</sup>H NMR** (500 MHz, CDCl<sub>3</sub>) δ 7.92 (dd, *J* = 5.3, 3.1 Hz, 2H), 7.78 (dd, *J* = 5.5, 2.8 Hz, 3H), 7.68 (d, *J* = 7.2 Hz, 1H), 7.66-7.60 (m, 2H);

**<sup>13</sup>C NMR** (126 MHz, CDCl<sub>3</sub>) δ 166.80 (s), 134.73 (s), 132.36 (s), 131.65-131.19 (m), 129.70 (s), 129.66 (s), 124.75 (s), 124.62 (d, *J* = 3.7 Hz), 123.91 (s), 123.33 (q, *J* = 3.8 Hz), 122.58 (s).

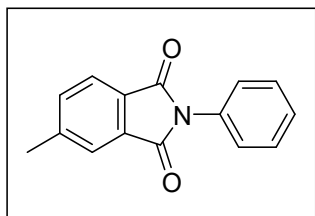

**5-methyl-2-phenylisoindoline-1,3-dione (3g)<sup>S2</sup>**

**<sup>1</sup>H NMR** (500 MHz, (CD<sub>3</sub>)<sub>2</sub>SO) δ 7.85 (d, *J* = 7.6 Hz, 1H), 7.79 (s, 1H), 7.71 (d, *J* = 7.6 Hz, 1H), 7.55-7.50 (m, 2H), 7.47-7.41 (m, 3H), 2.52 (s, 3H);

**<sup>13</sup>C NMR** (126 MHz, (CD<sub>3</sub>)<sub>2</sub>SO) δ 167.55, 167.45, 146.18, 135.55, 132.41, 132.33, 129.36, 129.31, 128.45, 127.81, 124.29, 123.83, 21.88.

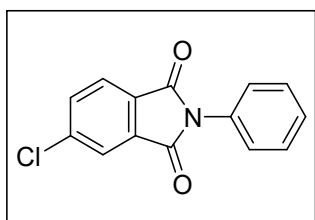

**5-chloro-2-phenylisoindoline-1,3-dione (3h)<sup>S2</sup>**

**<sup>1</sup>H NMR** (500 MHz, (CD<sub>3</sub>)<sub>2</sub>SO) δ 8.05 (s, 1H), 8.00-7.94 (m, 2H), 7.56-7.52 (m, 2H), 7.46 (t, *J* = 7.1 Hz, 3H);

**<sup>13</sup>C NMR** (126 MHz, (CD<sub>3</sub>)<sub>2</sub>SO) δ 166.64, 166.28, 139.91, 134.92, 134.09, 132.19, 130.63, 129.37, 128.68, 127.80, 125.64, 123.96.

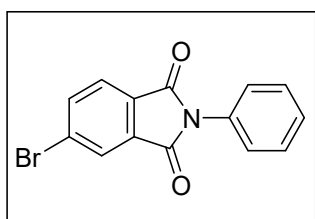

**5-bromo-2-phenylisoindoline-1,3-dione (3i)<sup>S2</sup>**

**<sup>1</sup>H NMR** (500 MHz, (CD<sub>3</sub>)<sub>2</sub>SO) δ 8.18 (d, *J* = 1.2 Hz, 1H), 8.11 (dd, *J* = 7.9, 1.2 Hz, 1H), 7.90 (d, *J* = 7.9 Hz, 1H), 7.54 (t, *J* = 7.8 Hz, 2H), 7.45 (t, *J* = 7.4 Hz, 3H);

**<sup>13</sup>C NMR** (126 MHz, (CD<sub>3</sub>)<sub>2</sub>SO) δ 166.83, 166.25, 137.85, 134.08, 132.18, 131.03, 129.37, 128.69, 128.66, 127.81, 126.76, 125.75.



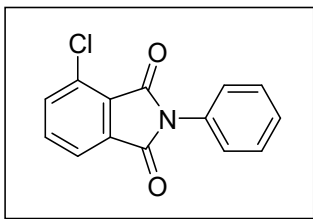

**4-chloro-2-phenylisoindoline-1,3-dione (3j)<sup>S2</sup>**

**<sup>1</sup>H NMR** (500 MHz, (CD<sub>3</sub>)<sub>2</sub>SO) δ 7.89 (dt, *J* = 22.3, 7.4 Hz, 3H), 7.58-7.51 (m, 2H), 7.46 (dd, *J* = 7.3, 4.8 Hz, 3H);

**<sup>13</sup>C NMR** (126 MHz, (CD<sub>3</sub>)<sub>2</sub>SO) δ 166.17, 165.18, 136.53, 136.30, 134.43, 132.14, 130.25, 129.36, 128.74, 127.99, 127.76, 122.78.

---

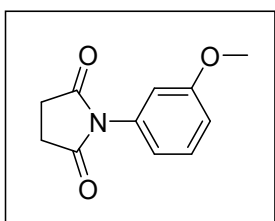

**1-(3-methoxyphenyl)pyrrolidine-2,5-dione (3k)<sup>S3</sup>**

**<sup>1</sup>H NMR** (500 MHz, (CD<sub>3</sub>)<sub>2</sub>SO) δ 7.39 (t, *J* = 8.3 Hz, 1H), 7.03-6.95 (m, 1H), 6.83 (d, *J* = 7.3 Hz, 2H), 3.75 (s, 3H), 2.76 (s, 4H);

**<sup>13</sup>C NMR** (126 MHz, (CD<sub>3</sub>)<sub>2</sub>SO) δ 177.34, 159.90, 134.32, 130.06, 119.84, 114.19, 113.49, 55.76, 28.93.

# NMR Spectra

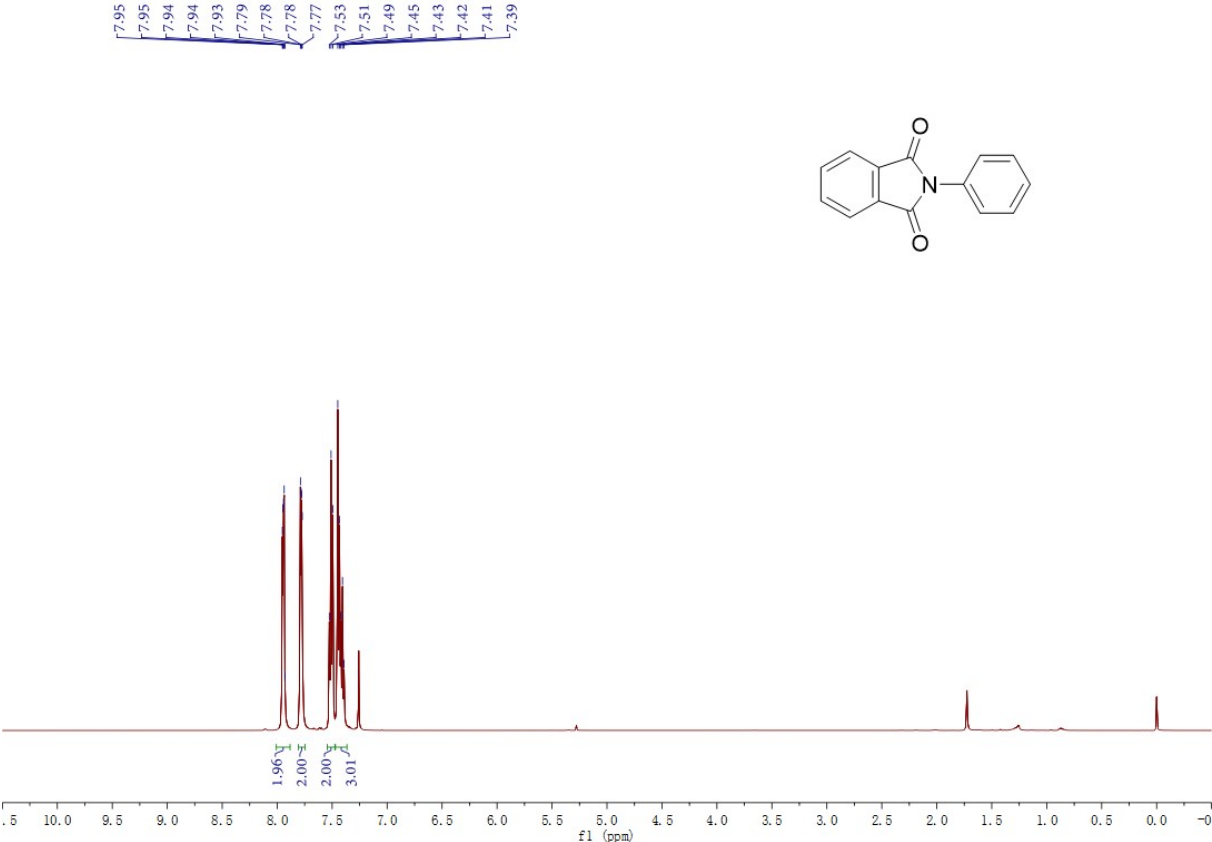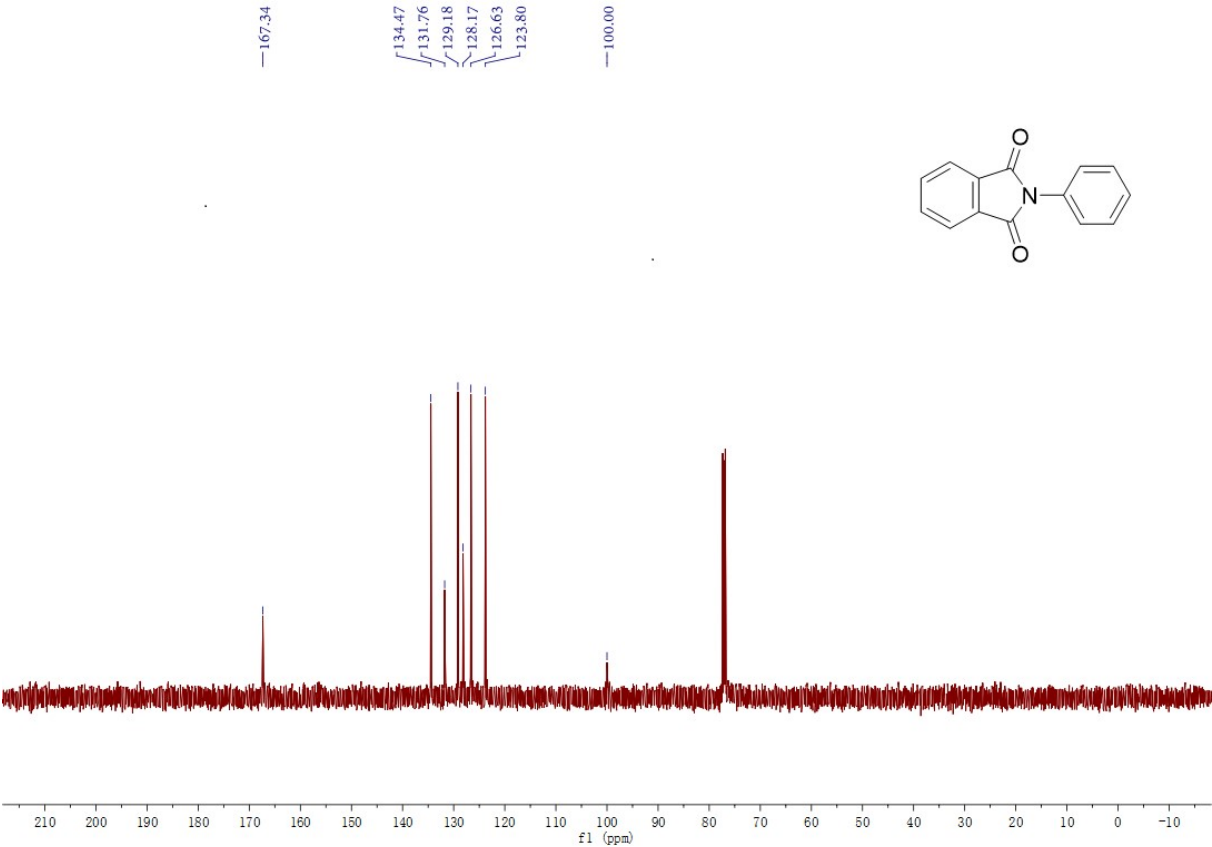

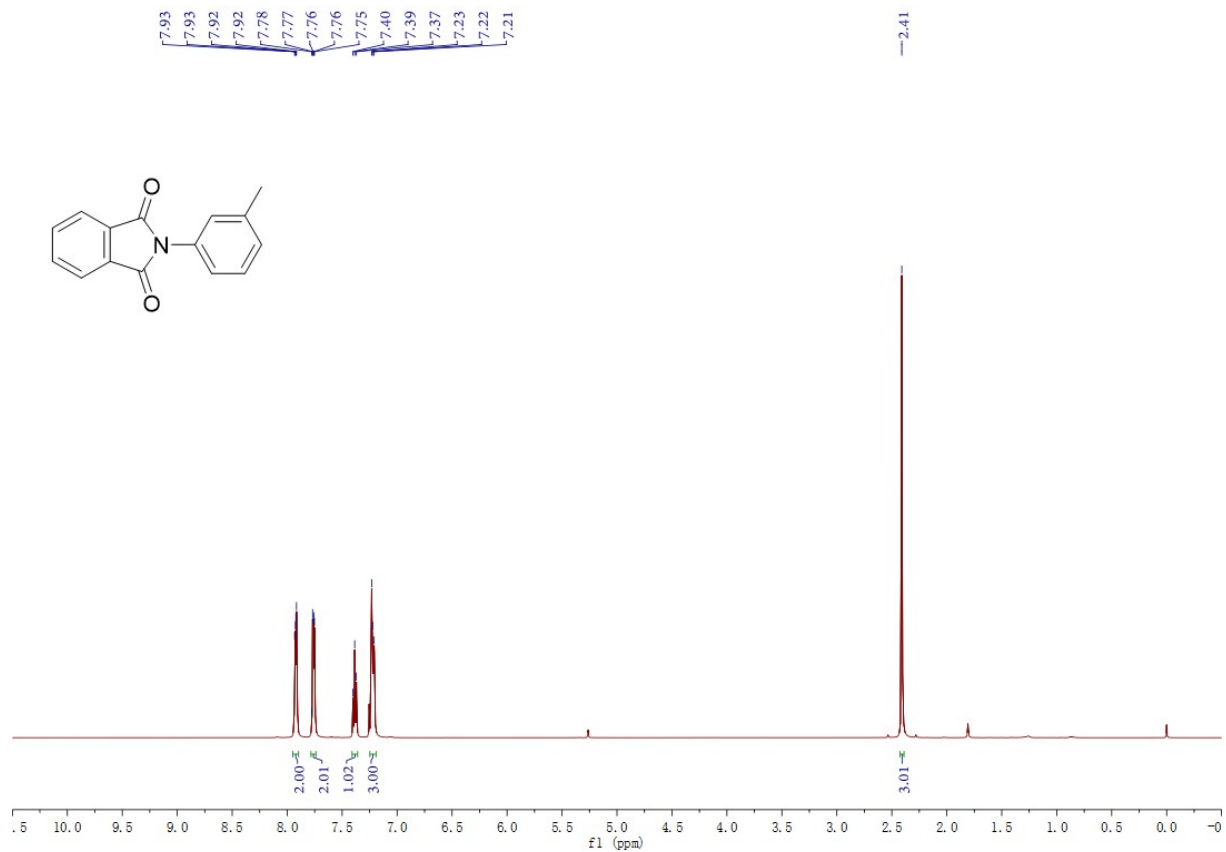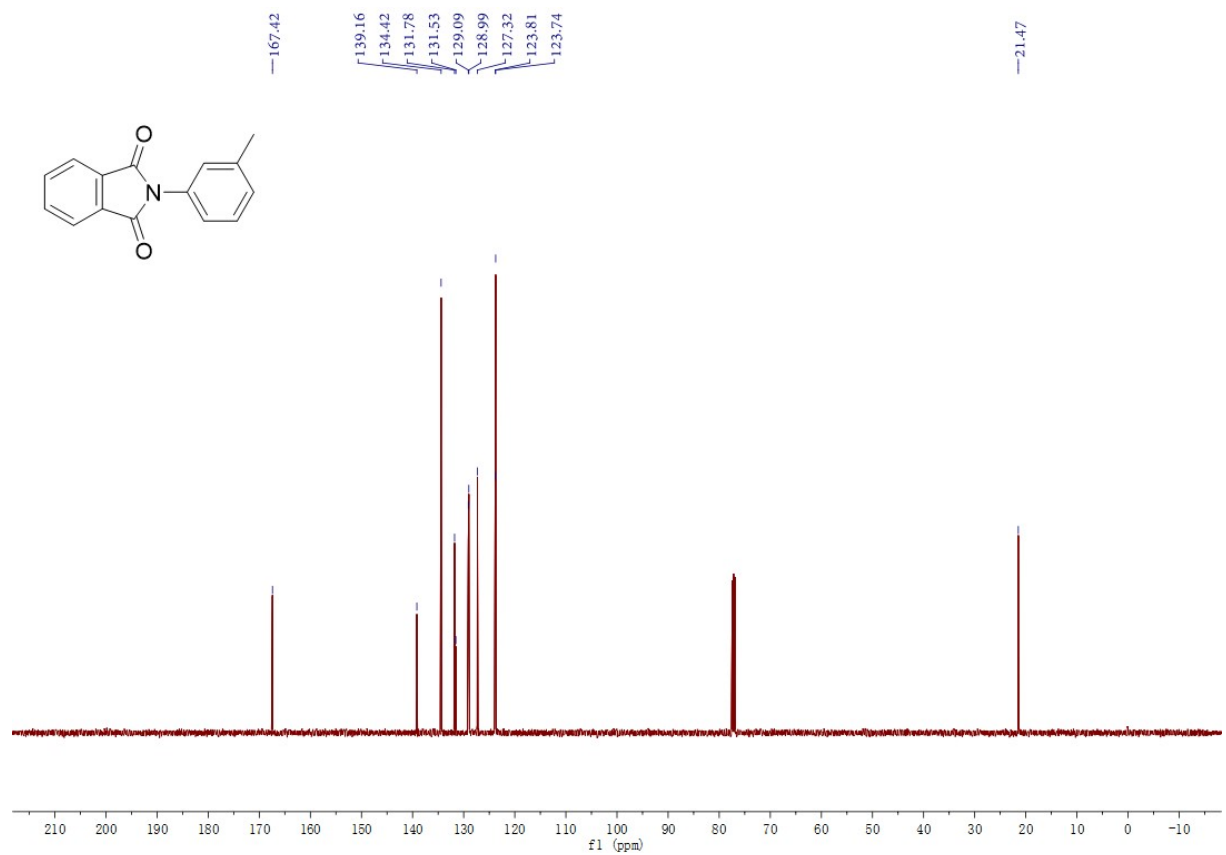

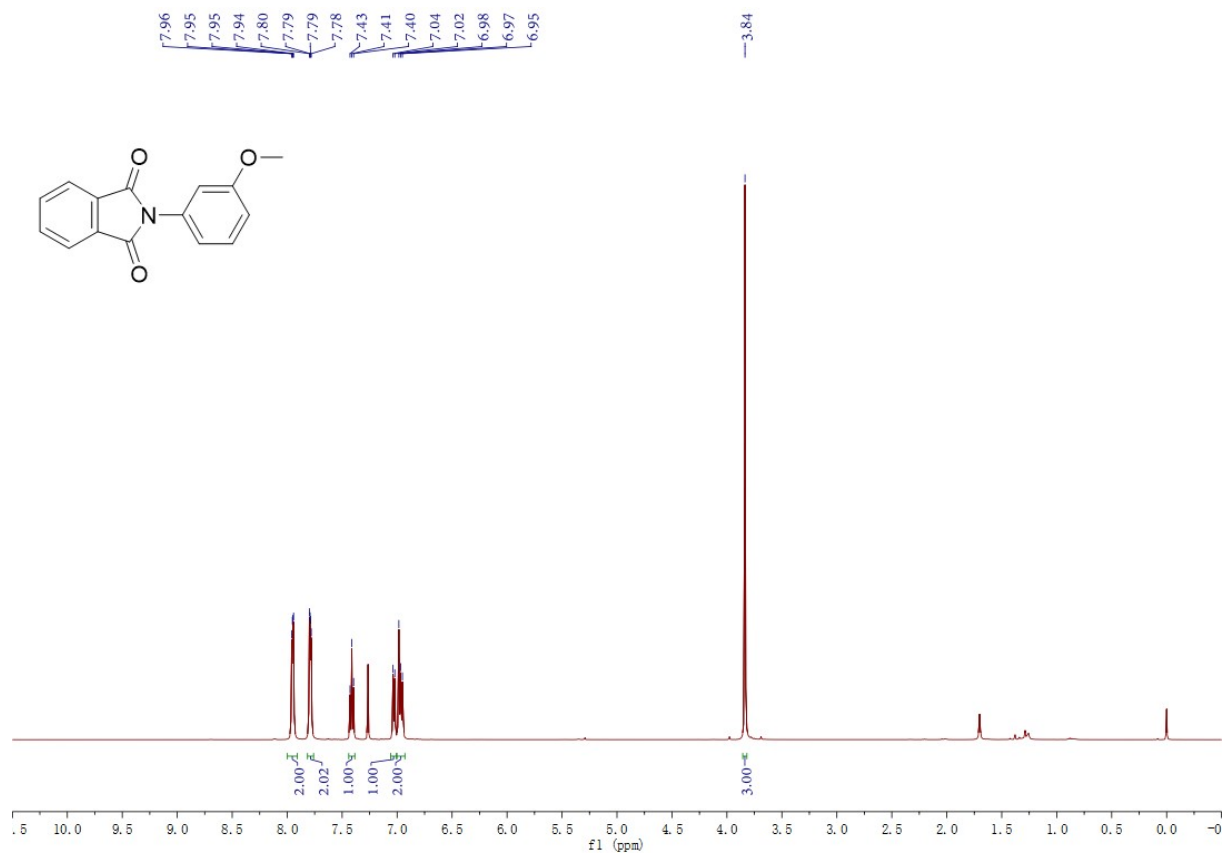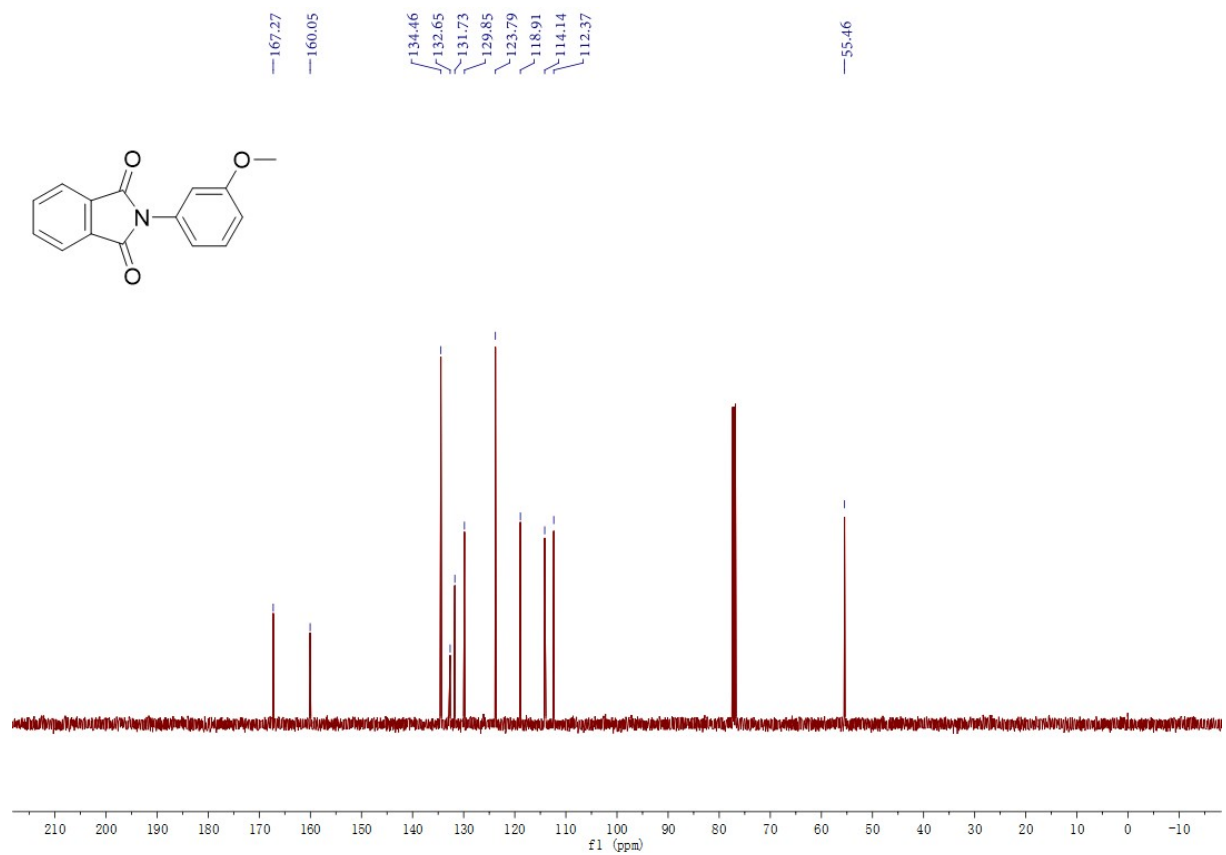

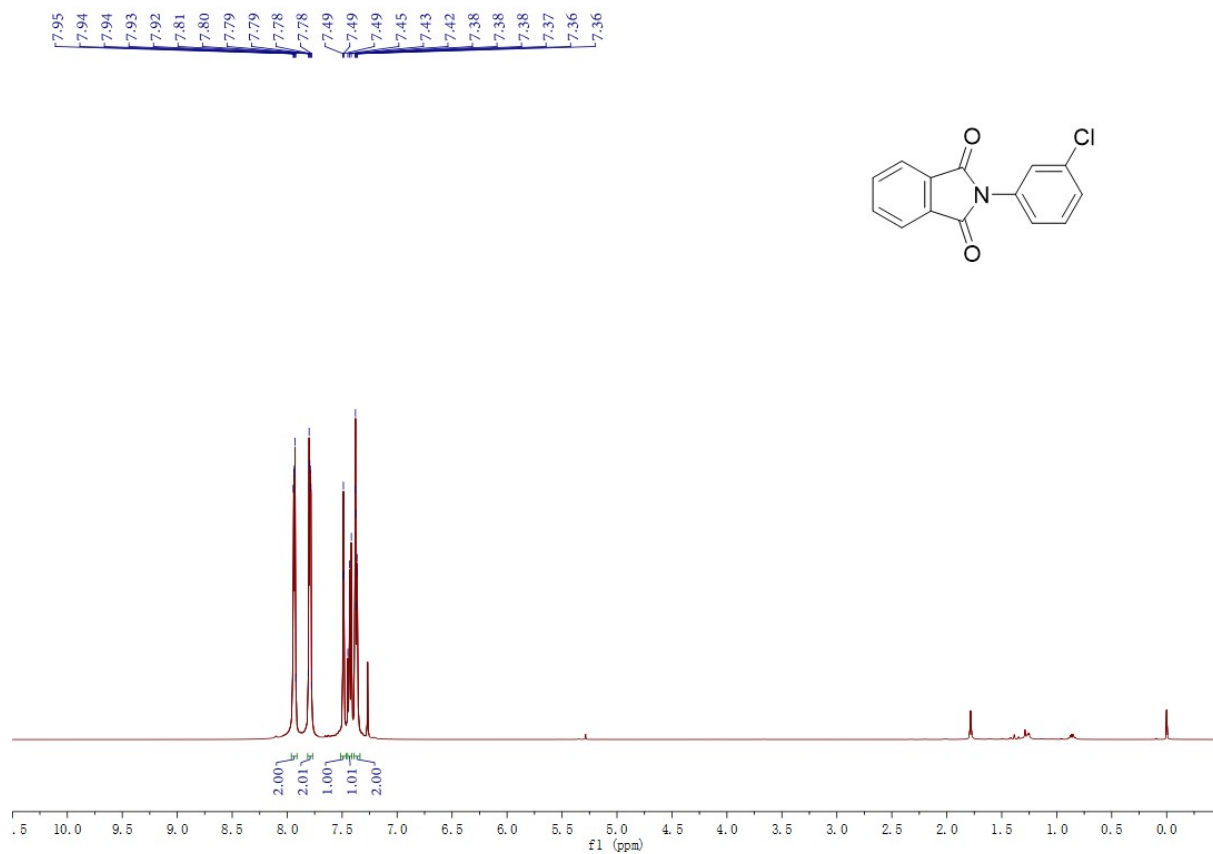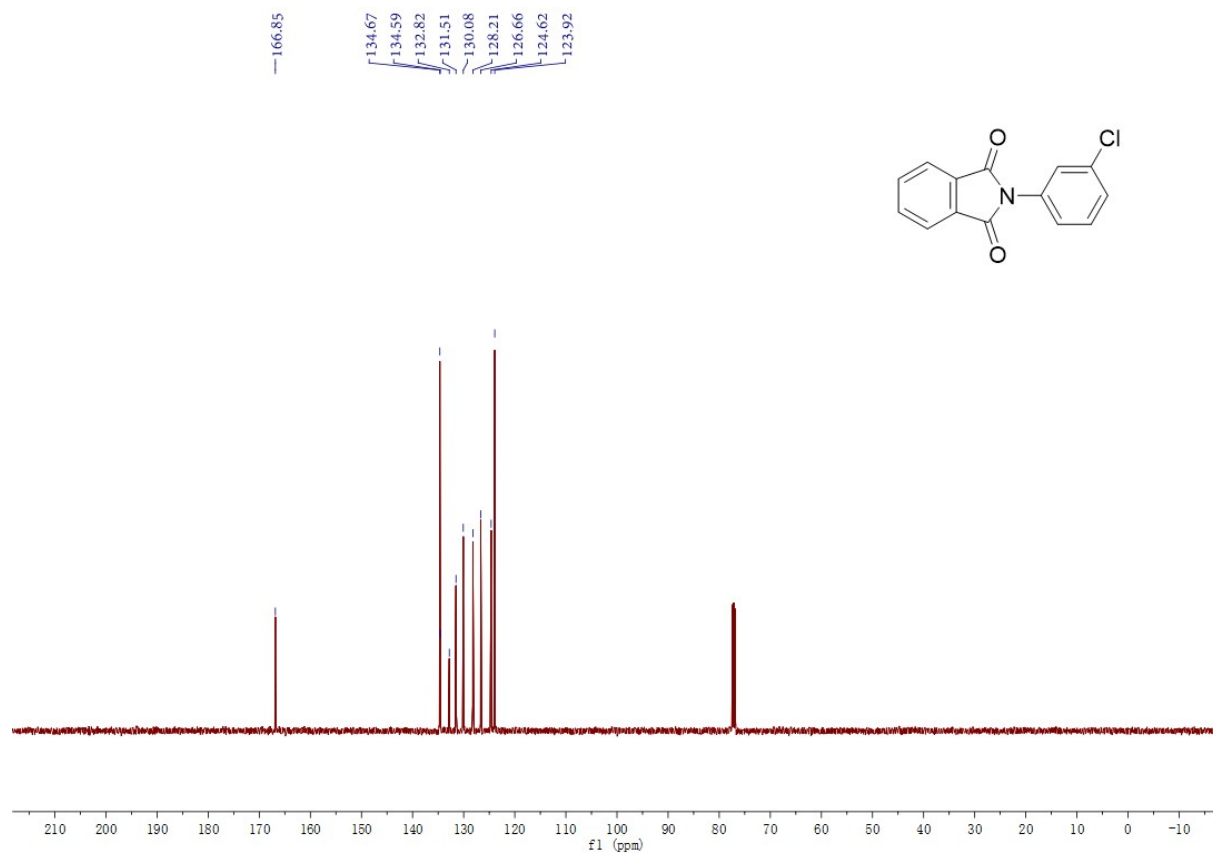

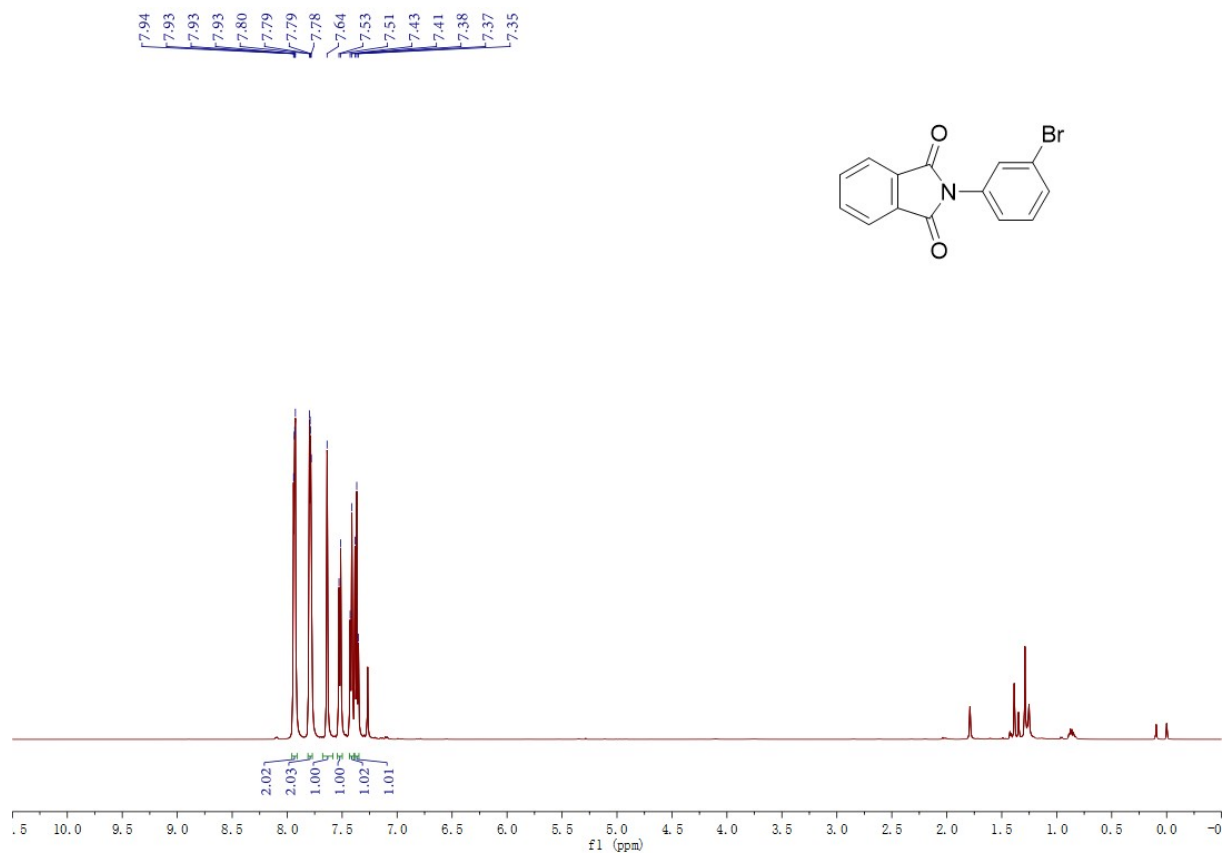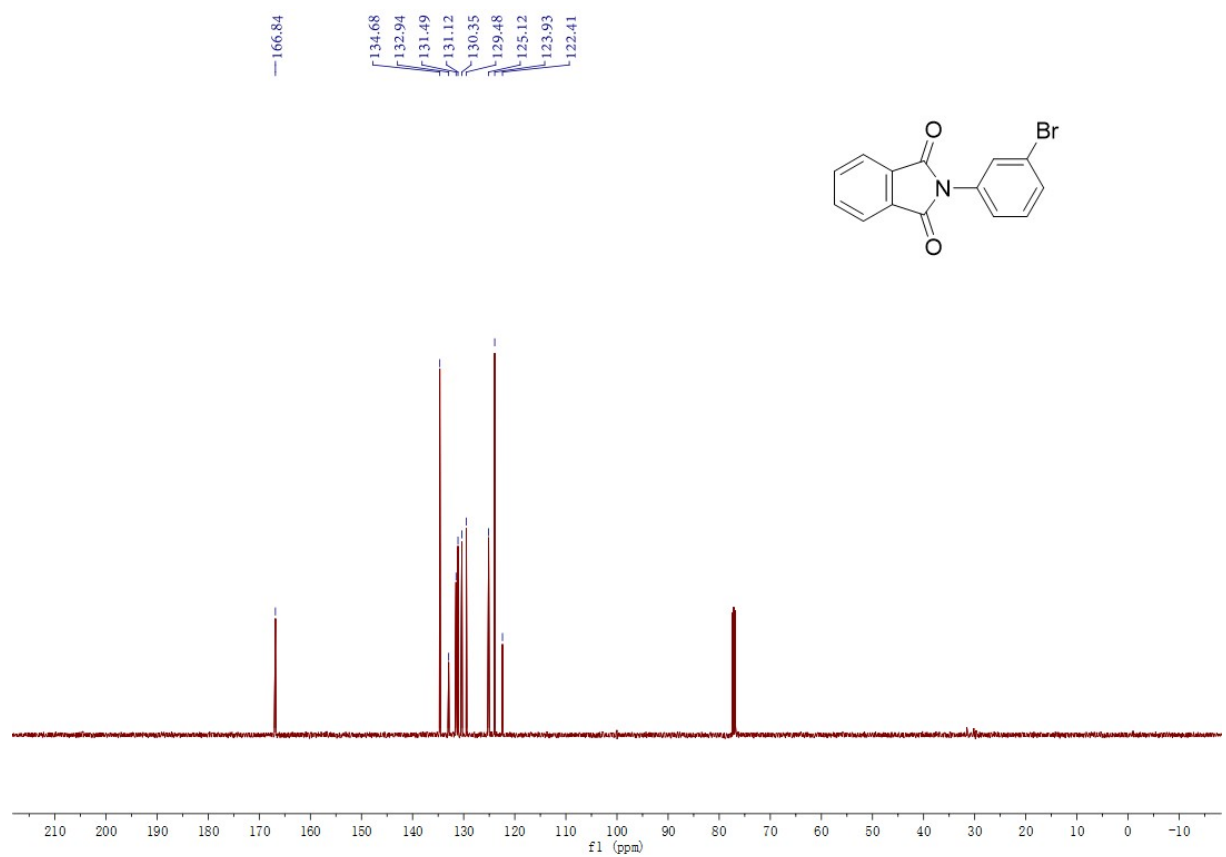

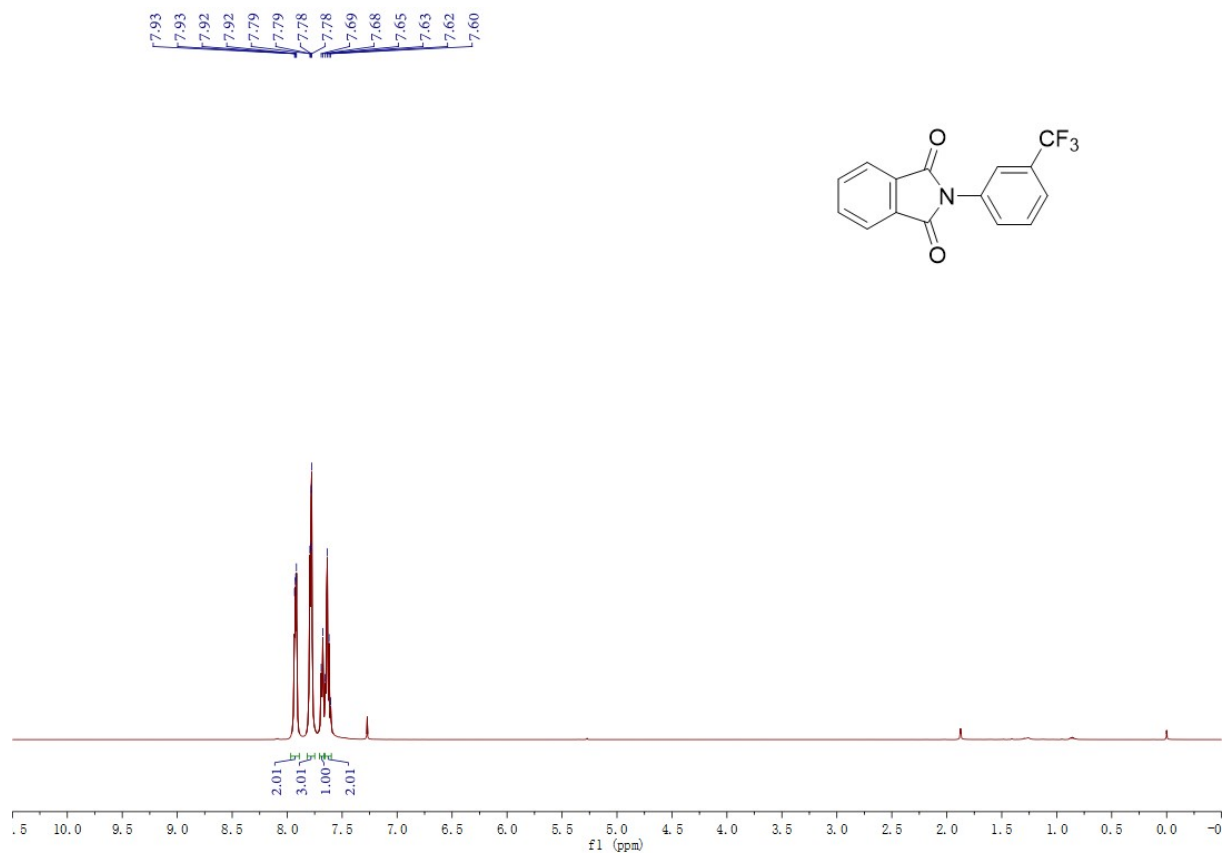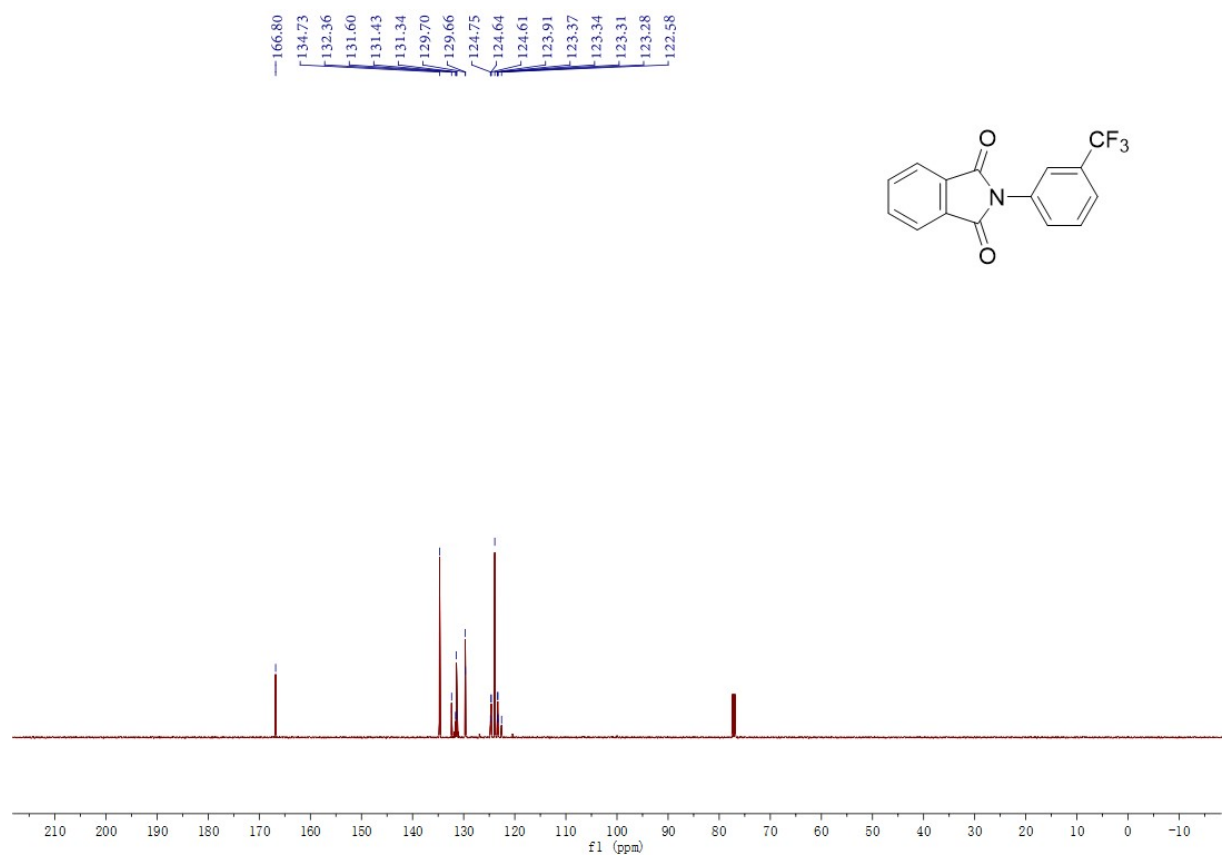

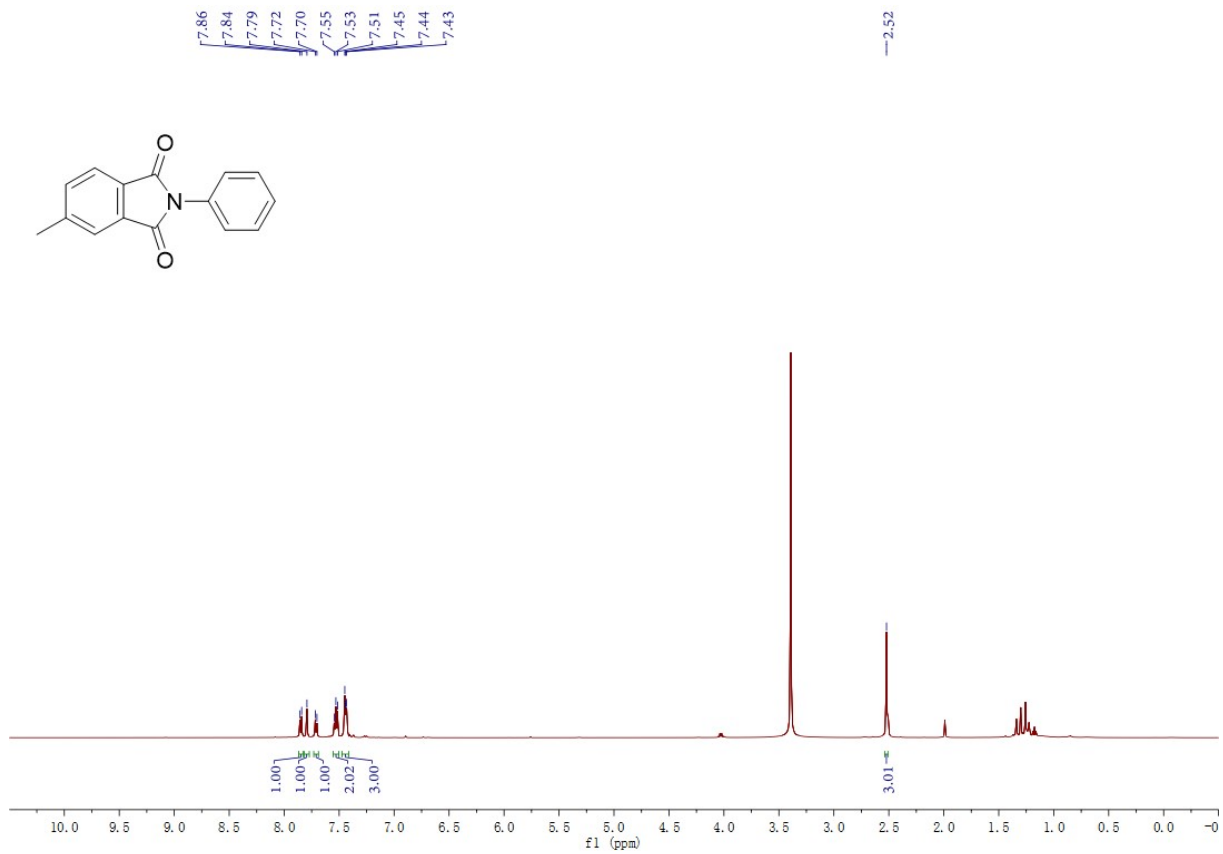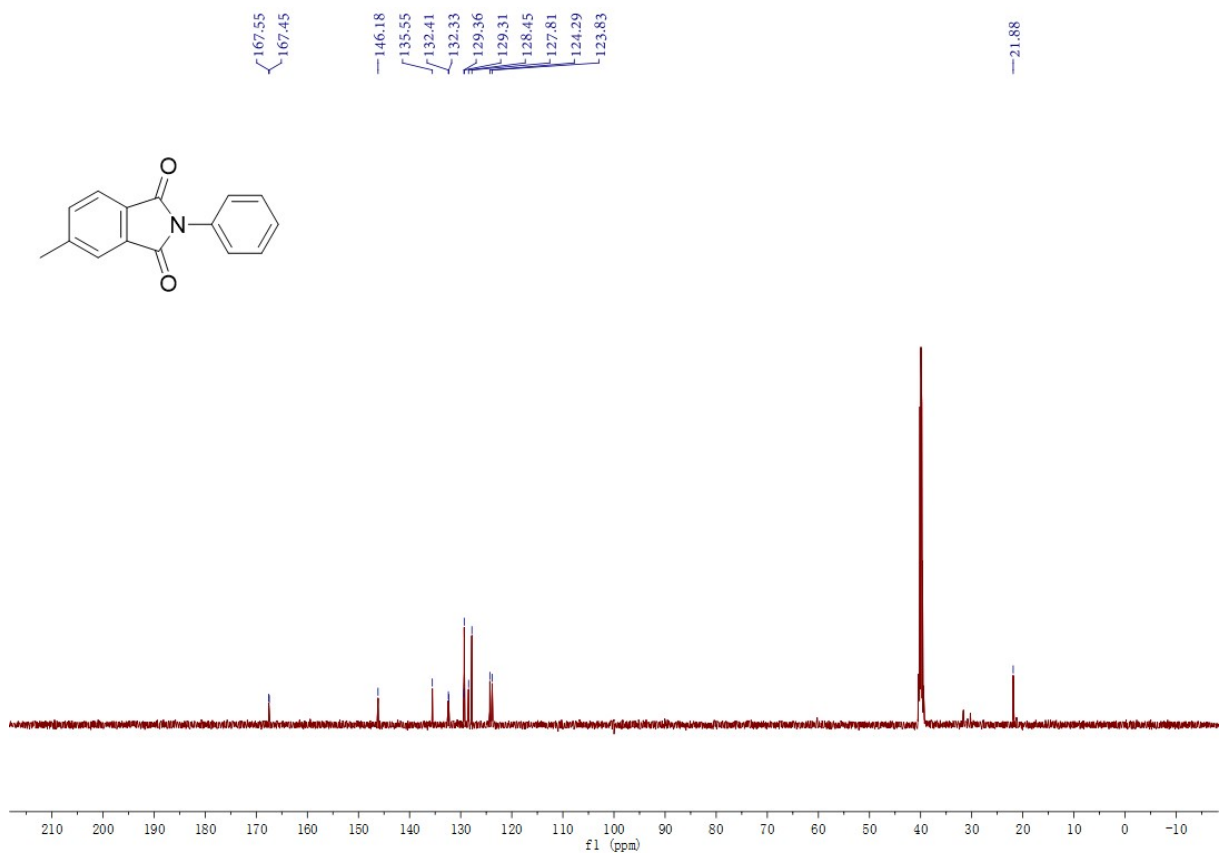



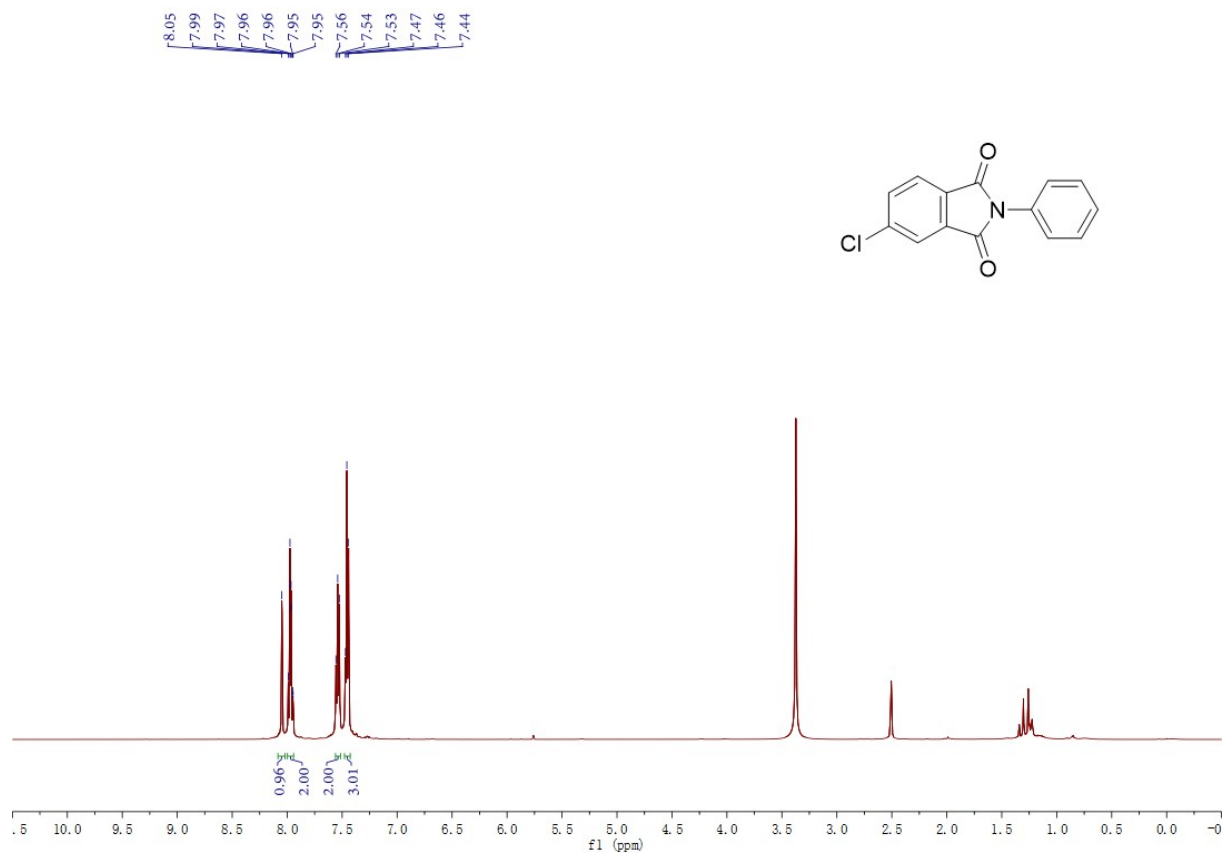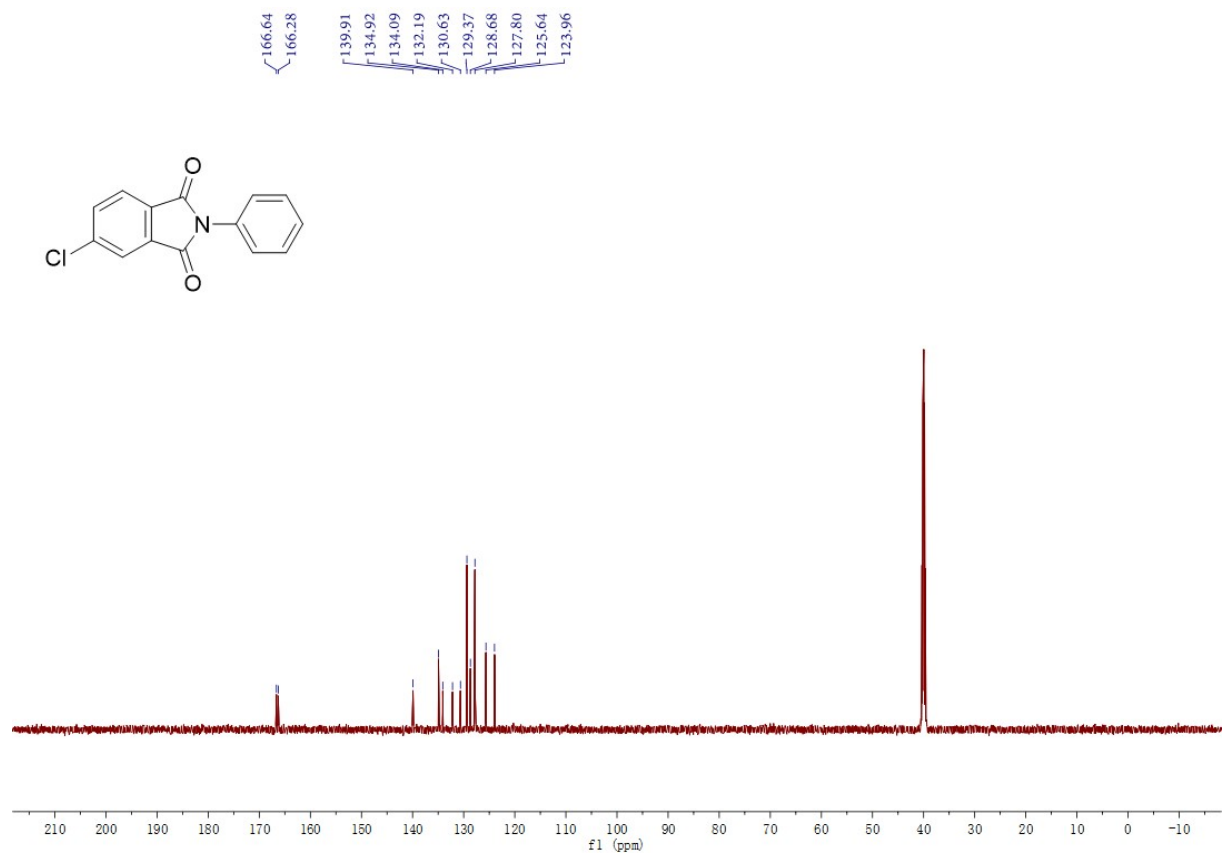

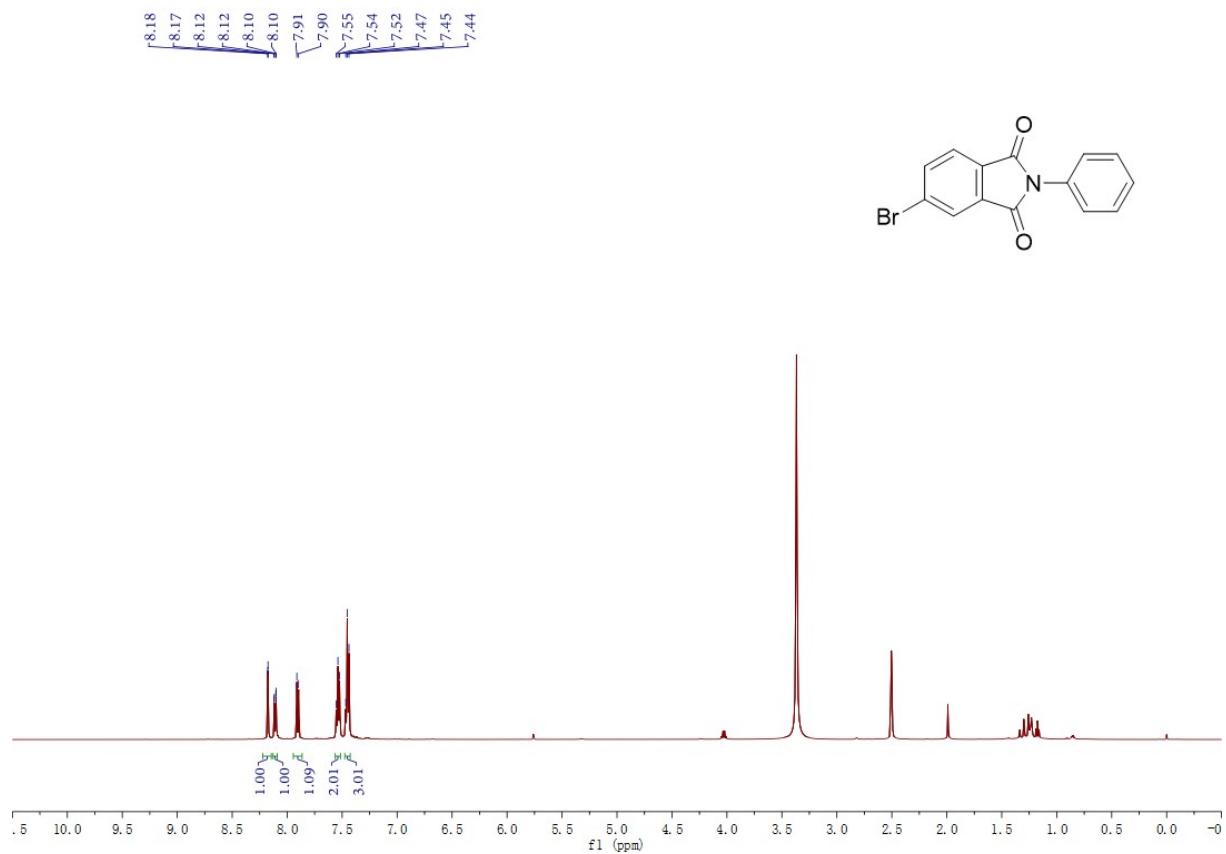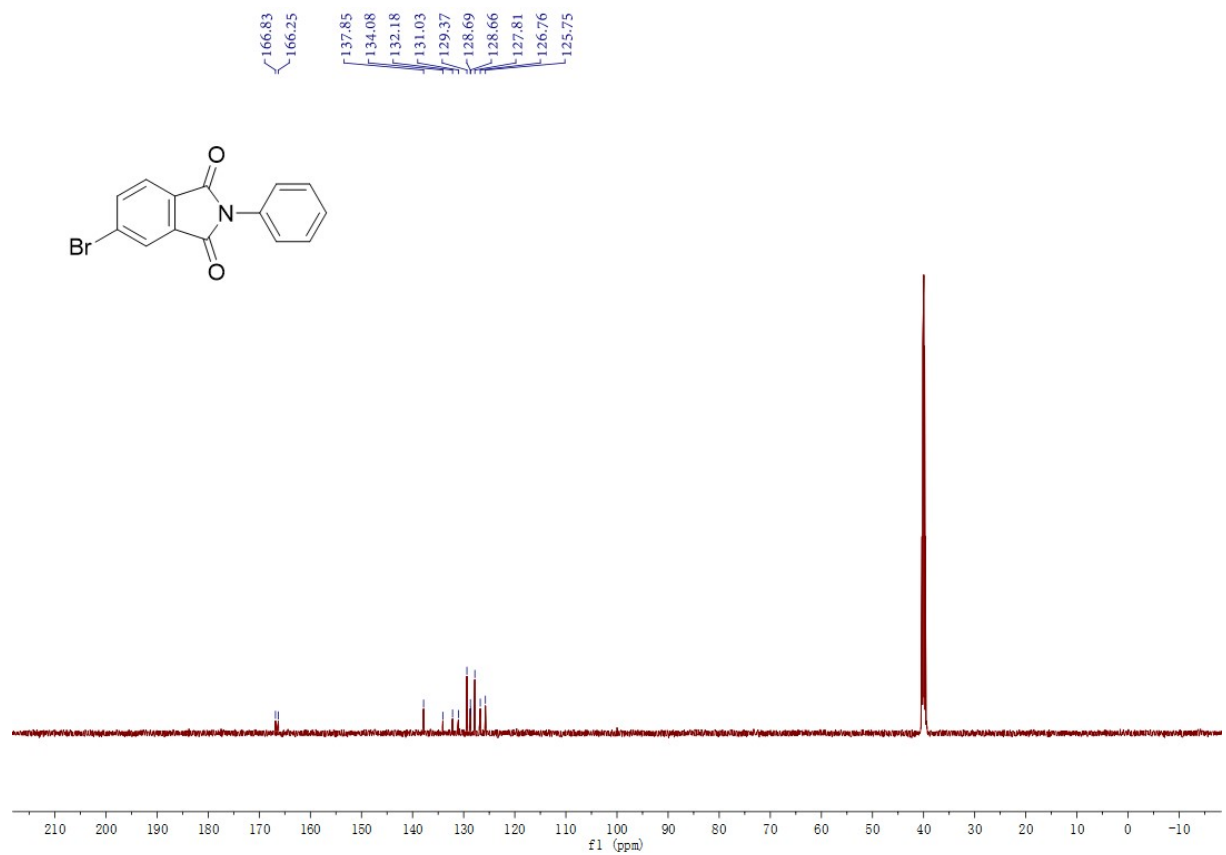

7.93  
7.92  
7.90  
7.89  
7.87  
7.86  
7.56  
7.54  
7.53  
7.48  
7.47  
7.46  
7.45

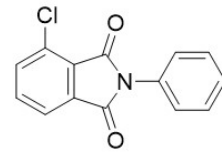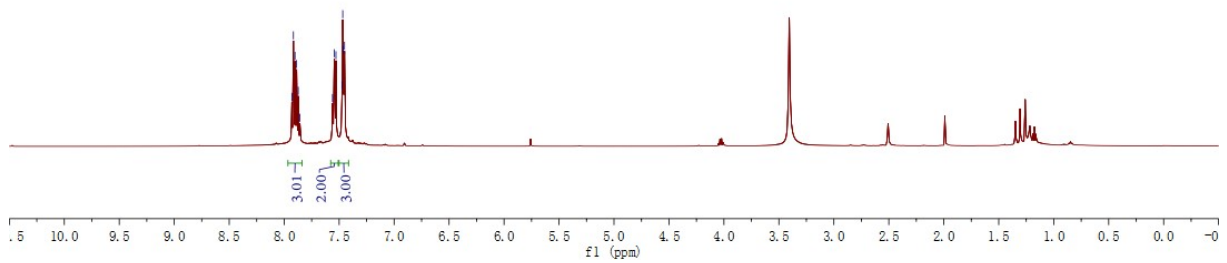

166.17  
165.18  
136.53  
136.30  
134.43  
132.14  
130.25  
129.36  
128.74  
127.99  
127.76  
122.78

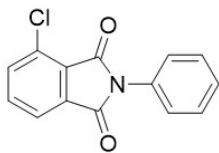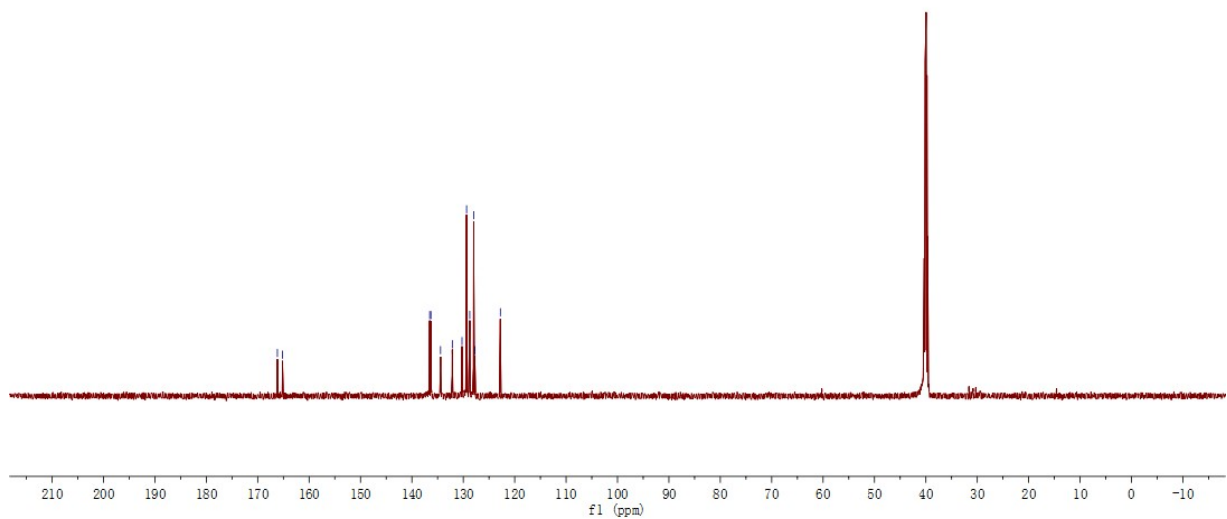

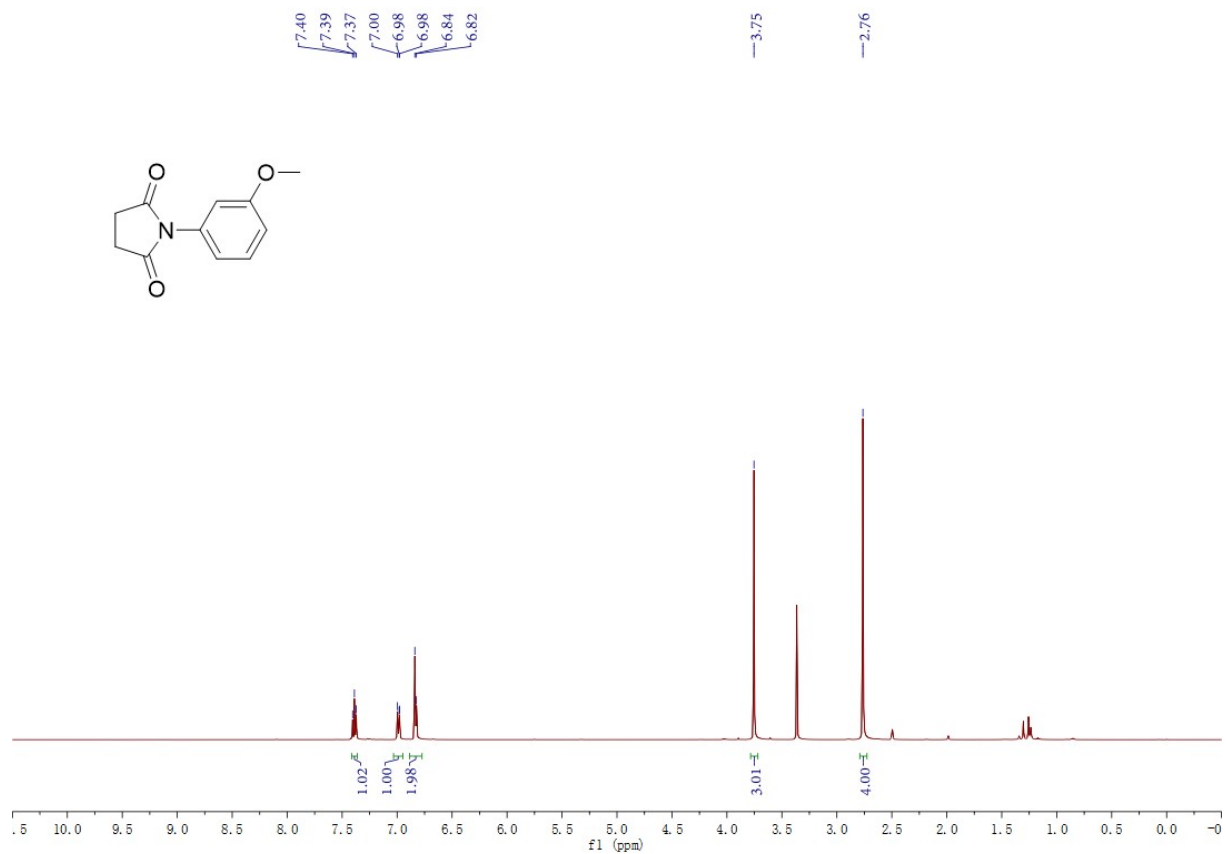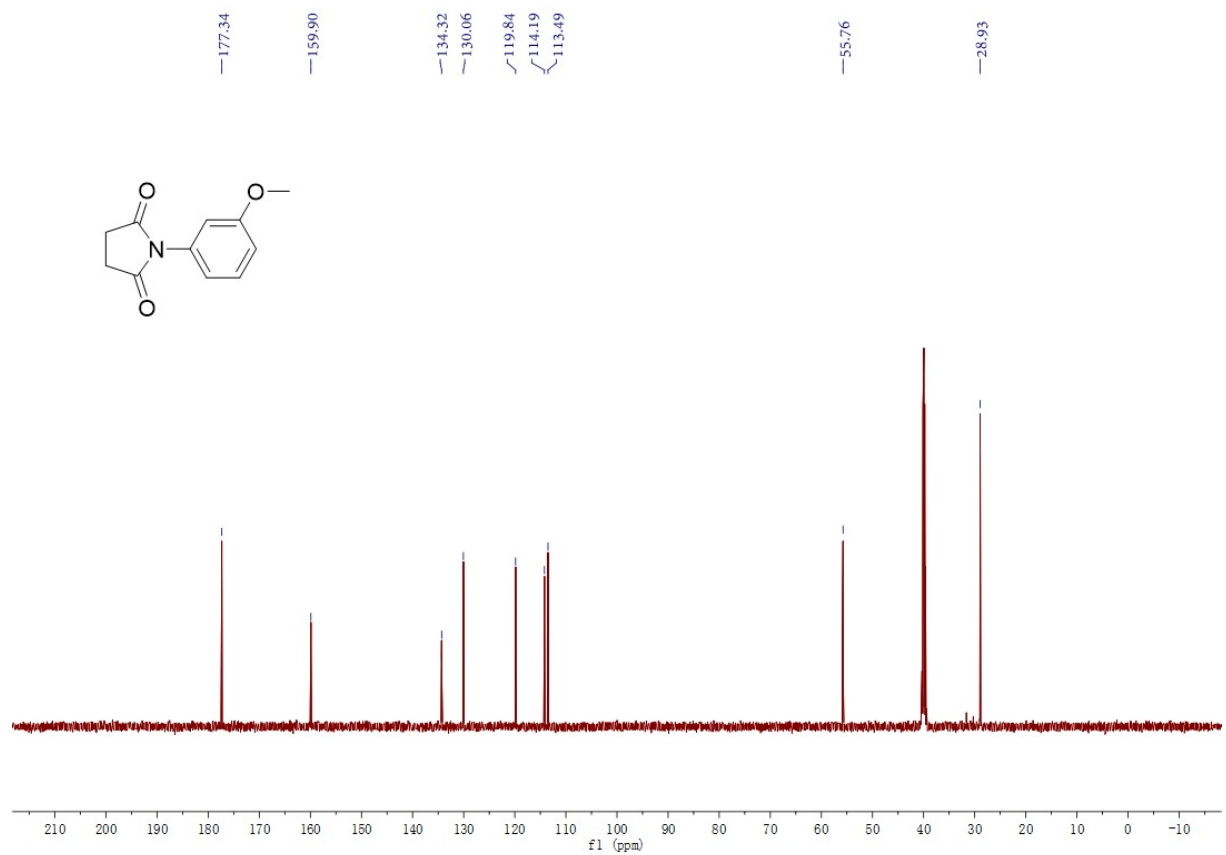

## References

- (S1) X. Wang, W. Xiong, Y. Huang, J. Zhu, Q. Hu, W. Wu, H. Jiang. *Org. Lett.*, 2017, **19**, 5818–582.
- (S2) B. Lv, P. Gao, S. Zhang, X. Jia, M. Wang, Y. Yuan. *Org. Chem. Front.*, 2021, **8**, 5440-5445.
- (S3) F. P. L. Lim, L. Y. Tan, E. R. T. Tiekinkb, A. V. Dolzhenko. *RSC Adv.*, 2018, **8**, 22351-22360.
